# Supplementary material for: Benchmark of star-allele caller algorithms to accurately assess haplotypes and phenotypes in pharmacogenetic studies
Source: Research Square preprint supplement (doi:10.21203/rs.3.rs-7924414/v1), 2025-11-06
Supplement: Supplementary file 2 [file 0fd516d73cc70f717f84d25f.xlsx]

## Sheet: Sheet 1
Table S1. Table of the curated diplotypes used from GeT-RM for 88 samples and 9 genes.
CYP2C19	NUDT15	DPYD	CYP2C9	CYP3A4	CYP4F2	CYP2B6	CYP3A5	SLCO1B1	ID
*1/*1		*1/*1	*1/*2	*1/*2	*1/*1	*2/*4	*3/*3	*1/*15	HG00276
*1/*1		*1/*1	*1/*1	*1/*1	*2/*3	*1/*6	*3/*3	*37/*37	HG00436
*1/*1		*1/*1	*1/*1	*1/*1	*1/*1	*1/*1	*3/*3	*37/*37	HG00589
*1/*2		*1/rs1801265	*2/*61	*1/*1	*1/*3		*1/*1	*1/*1	HG01190
*1/*1		rs1801158/rs67376798	*1/*1	*1/*1	*1/*1	*1/*6	*3/*3	*15/*15	NA06991
*1/*1		*1/*1	*1/*2	*1/*22		*1/*1	*3/*3	*1/*15	NA06993
*1/*17	*1/*6	*1/*1	*1/*1	*1/*1		*1/*1	*1/*3	*1/*15	NA07000
*1/*17		*1/*1	*1/*1	*1/*1	*1/*3		*3/*3	*1/*14	NA07019
*8/*17		*1/*1	*1/*2	*1/*1	*3/*3	*6/*27	*1/*3	*1/*1	NA07029
*1/*17		*1/*1	*1/*1	*1/*1		*1/*1	*3/*3	*1/*1	NA07048
*1/*17		*1/*1	*1/*1	*1/*1	*1/*1	*6/*27	*3/*3	*1/*14	NA07055
*1/*1		*1/*1	*1/*1	*1/*22	*3/*3	*6/*22	*3/*3	*1/*14	NA07056
*2/*17		*1/rs1801265	*1/*1	*1/*1	*1/*1	*1/*1	*3/*3	*1/*1	NA07348
*2/*17		*1/rs1801265	*1/*1	*1/*1	*1/*1	*1/*1	*3/*3	*1/*15	NA07357
*1/*17		*1/rs1801265	*1/*2	*1/*1	*1/*1	*1/*1	*3/*3	*1/*14	NA10831
*1/*1		*1/*1	*1/*1	*1/*1		*6/*6	*3/*3	*1/*1	NA10838
*1/*17		*1/rs1801265	*1/*1	*1/*1		*1/*1	*3/*3	*1/*1	NA10846
*1/*1		*1/rs1801265	*1/*1	*1/*1	*1/*1	*1/*6	*3/*3	*5/*15	NA10847
*1/*17		*1/rs1801265	*1/*1	*1/*1	*1/*1		*3/*3	*1/*14	NA10851
*1/*1		*1/*1	*2/*2	*1/*1	*1/*3	*1/*1	*1/*3	*1/*1	NA10854
*1/*1		*1/*1	*2/*3	*1/*1		*1/*1	*3/*3	*1/*1	NA10855
*1/*2		*1/*1	*1/*2	*1/*1		*1/*1	*1/*3	*1/*1	NA10856
*1/*1		*1/rs1801265	*1/*1	*1/*1		*1/*6	*3/*3	*1/*15	NA10859
*8/*17		*1/*1	*1/*2	*1/*1			*3/*3	*1/*1	NA10865
*1/*2		*1/*1	*1/*3	*1/*1	*1/*1	*1/*1	*3/*3	*1/*1	NA11832
*1/*1		*1/*1	*2/*3	*1/*1	*1/*3		*1/*3	*1/*37	NA11839
*1/*17		*1/*1	*1/*1	*1/*1		*1/*6	*3/*3	*1/*15	NA11881
*1/*1		*1/*1	*1/*1	*1/*1	*1/*3	*1/*1	*3/*3	*1/*17	NA11993
*1/*1		*1/*1	*1/*2	*1/*1	*1/*1	*6/*6	*1/*3	*1/*15	NA12003
*1/*1		*1/*1	*1/*1	*1/*3	*2/*3		*3/*3	*1/*21	NA12006
*2/*17		*1/rs1801265	*1/*1	*1/*1	*1/*1	*1/*1	*3/*3	*1/*1	NA12145
*1/*1		*1/*1	*1/*2	*1/*1	*2/*3	*1/*1	*3/*3	*1/*21	NA12156
*1/*17		rs1801265/rs1801265	*1/*1	*1/*1	*1/*1		*3/*3	*1/*14	NA12236
*17/*17		*1/rs1801265	*1/*1	*1/*35		*1/*6	*3/*3	*1/*1	NA12336
*2/*2		*1/*1	*1/*1	*1/*22	*1/*3	*1/*7	*1/*3	*1/*1	NA12717
*1/*2		*1/rs1801265	*1/*9	*1/*1		*1/*6	*3/*3	*1/*1	NA12753
*1/*17		*1/rs1801158	*1/*3	*1/*1	*1/*3	*1/*2	*3/*3	*1/*21	NA12813
*1/*2		*1/rs1801265	*1/*8	*1/*1		*1/*1	*3/*3	*1/*1	NA12815
*1/*17		*1/*1	*1/*1	*1/*1	*1/*1	*1/*6	*3/*3	*1/*1	NA12873
*1/*2		*1/rs1801158	*1/*2	*1/*1	*1/*1	*1/*1	*3/*3	*1/*15	NA12878
*1/*1		*1/*1	*1/*2	*1/*22		*1/*1	*3/*3	*1/*15	NA12892
*1/*2		*1/rs1801265	*1/*9	*1/*1	*1/*2	*1/*18	*1/*7	*1/*37	NA18484
*2/*17		*1/rs1801265	*1/*1	*1/*1	*1/*2	*1/*6	*1/*6	*1/*37	NA18518
*1/*17		rs1801265/rs1801265	*1/*5	*1/*1	*2/*3	*1/*6	*1/*6	*37/*37	NA18519
*1/*1		*1/*1	*1/*1	*1/*1	*1/*3	*1/*1	*1/*1	*1/*15	NA18526
*1/*2		*1/*1	*1/*1	*1/*1	*1/*1	*1/*1	*1/*3	*37/*17	NA18544
*1/*4		*1/*1	*1/*1	*1/*1	*1/*3	*1/*6	*3/*3	*1/*15	NA18552
*1/*1		*1/*1	*1/*3	*1/*1		*1/*1	*1/*1	*1/*17	NA18563
*2/*3	*1/*3	*1/rs1801265	*1/*1	*1/*1	*3/*3	*1/*1	*1/*1	*1/*1	NA18564
*1/*1		*1/*1	*1/*1	*1/*1	*1/*1	*1/*1	*1/*3	*1/*1	NA18565
*1/*1		*1/*1	*1/*1	*1/*1		*1/*1	*1/*3	*1/*1	NA18572
*1/*2		*1/*1	*1/*1	*1/*1		*1/*1	*3/*3	*1/*1	NA18617
*1/*2		rs1801265/rs1801265	*1/*9	*1/*1	*1/*1	*6/*6	*3/*6	*37/*37	NA18855
*1/*1		*1/rs1801265	*1/*1	*1/*1	*1/*1	*1/*18	*1/*1	*1/*14	NA18861
*1/*2		*1/rs1801265	*1/*1	*1/*1	*1/*2	*1/*6	*1/*3	*37/*37	NA18868
*1/*2		*1/rs1801265	*1/*8	*1/*1		*1/*18	*1/*1	*1/*1	NA18873
*1/*1		*1/*1	*1/*1	*1/*1	*1/*1	*1/*2	*3/*3	*37/*37	NA18942
*1/*2		*1/*1	*1/*1	*1/*1			*1/*3	*1/*1	NA18945
*1/*1		*1/*1	*1/*1	*1/*1	*1/*1	*1/*1	*3/*3	*1/*1	NA18952
*1/*1		*1/*1	*1/*3	*1/*1	*1/*1		*1/*3	*37/*37	NA18959
*1/*1		rs17376848/rs188052243		*1/*16	*1/*3	*1/*6	*1/*3	*1/*1	NA18966
*1/*1		*1/rs1801265	*1/*1	*1/*1	*1/*1	*1/*6	*1/*3	*1/*1	NA18973
*1/*1		*1/*1	*1/*1	*1/*1	*1/*1	*6/*6	*1/*3	*1/*37	NA18980
*1/*1	*1/*3	*1/*1	*1/*1	*1/*1	*1/*1	*1/*6	*3/*3	*1/*17	NA18992
*1/*2		*1/*1	*1/*1	*1/*1	*1/*1	*1/*6	*3/*3	*37/*37	NA19003
*1/*1		*1/*1	*1/*1	*1/*1	*1/*3	*1/*1	*3/*3	*37/*37	NA19007
*17/*17		*1/*1	*1/*1	*1/*12		*1/*6	*1/*7	*1/*1	NA19035
*1/*1		rs1801265/rs1801265	*1/*1	*1/*1	*1/*3	*18/*18	*1/*3	*37/*37	NA19095
*17/*17		*1/rs1801265	*1/*1	*1/*15	*1/*1	*1/*6	*1/*3	*1/*15	NA19109
*2/*35		*1/*1	*1/*11	*1/*1	*1/*2	*6/*6	*1/*1	*37/*37	NA19122
*1/*39		*1/*1	*1/*6	*1/*1	*1/*1	*6/*6	*6/*7	*37/*37	NA19143
*1/*17		*1/rs1801265	*1/*1	*1/*1	*1/*1	*1/*18	*1/*3	*37/*37	NA19147
*1/*2		*1/*1	*1/*1	*1/*1	*1/*1	*6/*18	*1/*6	*1/*37	NA19174
*2/*17		*1/*1	*1/*1	*1/*1	*1/*1	*6/*6	*1/*3	*1/*37	NA19176
*2/*17		*1/rs1801265+rs115232898	*1/*1	*1/*1	*1/*1	*1/*6	*3/*7	*1/*37	NA19207
*1/*39		*1/*1	*1/*6	*1/*1	*1/*1	*6/*6	*1/*6	*1/*14	NA19213
*1/*2		*1/rs1801265	*1/*8	*1/*15	*1/*2	*18/*20	*1/*6	*1/*1	NA19226
*1/*1		rs1801265/rs1801265	*1/*1	*1/*1		*1/*6	*1/*1	*1/*1	NA19238
*13/*17		*1/rs1801265	*1/*1	*1/*1	*1/*1	*1/*6	*1/*1	*1/*1	NA19239
*1/*1		rs1801265/rs1801265	*1/*9	*1/*1		*1/*6	*1/*3	*1/*1	NA19700
*1/*1		*1/*1	*1/*1	*1/*1		*1/*1	*1/*3	*1/*1	NA19785
*1/*1		*1/*1	*1/*2	*1/*1	*2/*3		*3/*3	*1/*1	NA19789
*1/*17		*1/rs1801265	*1/*1	*1/*1	*2/*3	*1/*1	*3/*6	*37/*37	NA19819
*1/*17		*1/rs1801265	*1/*5	*1/*15	*2/*3	*1/*6	*1/*3	*1/*1	NA19908
*2/*15		rs1801265/rs1801265	*1/*1	*1/*1		*6/*6	*1/*7	*1/*1	NA19917
*1/*1		rs1801265/rs1801265	*1/*1	*1/*1	*1/*1	*6/*6	*7/*7	*1/*1	NA19920
*1/*1		*1/rs1801265	*1/*1	*1/*1	*1/*1	*1/*2	*1/*6	*37/*37	NA20296
*2/*2		*1/rs1801265	*1/*1	*1/*1	*1/*1	*1/*7	*3/*3	*1/*15	NA20509
