# Supplementary material for: Benchmark of star-allele caller algorithms to accurately assess haplotypes and phenotypes in pharmacogenetic studies
Source: Research Square preprint supplement (doi:10.21203/rs.3.rs-7924414/v1), 2025-11-06
Supplement: Supplementary file 3 [file 17f4880df570ba264be74379.xlsx]

## Sheet: Feuil1
Table 2. Concordance table with GeT-RM per gene and per type of data
concordance with GeT-RM
Gene	Genotyping			Low-pass			Imputation			WGS
	ursaPGx	PyPGx	PharmCAT	ursaPGx	PyPGx	PharmCAT	ursaPGx	PyPGx	PharmCAT	ursaPGx	PyPGx	PharmCAT
CYP2B6 (n=78)	0.4359	0.4359	0.3974	0.4359	0.4359	0.4359	0.4231	0.4231	0.4231	0.4231	0.4231	0.4231
CYP2C19 (n=88)	-	0.0682	0	0.8977	0.9091	0.8977	0.8977	0.8977	0.8864	0.9091	0.9205	0.9091
CYP2C9 (n=87)	0.931	0.931	0.7241	0.9425	0.9425	0.8736	0.9425	0.9655	0.8966	0.9655	0.9885	0.9195
CYP3A4 (n=88)	0.9773	0.9773	0.9318	0.9886	0.9886	0.9886	0.9886	0.9886	0.9886	1	1	1
CYP3A5 (n=88)	1	1	1	0.9318	0.9318	0.9318	1	1	1	1	1	1
CYP4F2 (n=64)	0.625	0.625	0.4219	0.6406	0.6406	0.6406	0.6563	0.6563	0.6563	0.6406	0.6406	0.6406
DPYD (n=88)	0.4773	0.5909	0.4659	0.4659	0.5909	0.4659	0.4773	0.5909	0.4659	0.4659	0.5909	0.4659
NUDT15 (n=3)	0.6667	0.6667	0	0.6667	0.6667	0	0.6667	0.6667	0.6667	0.6667	1	1
SLCO1B1 (n=88)	0.5	0.5	0.3409	0.5	0.5	0.3409	0.5	0.5	0.3409	0.5	0.5	0.3409
