# Supplementary material for: Benchmark of star-allele caller algorithms to accurately assess haplotypes and phenotypes in pharmacogenetic studies
Source: Research Square preprint supplement (doi:10.21203/rs.3.rs-7924414/v1), 2025-11-06
Supplement: Supplementary file 4 [file b3b6b495c08209331c5552f3.xlsx]

## Sheet: Sheet 1
Table S2. Table of the probes used to simulate SNP-chip data
chr	name	position	AlleleA	AlleleB	Liftover.38.Chr	Liftover.38.Pos
0	10:86919364	0	-	G	chr0	0
0	10:87894105	0	-	GTA	chr0	0
0	10:87933068	0	-	C	chr0	0
0	10:88678994	0	-	G	chr0	0
0	10:89692874_ilmndup1	0	-	CAACATGATTGTC	chr0	0
0	11:112094871	0	-	C	chr0	0
0	22:24301858_CNV_GSTT2B_Ilmndup1	0	A	C	chr0	0
0	22:24301858_CNV_GSTT2B_Ilmndup2	0	A	C	chr0	0
0	22:24301858_CNV_GSTT2B_Ilmndup3	0	A	C	chr0	0
0	7:6026426	0	T	-	chr0	0
0	IDS-chrX-148584849	0	T	-	chr0	0
0	IlmnSeq_10:86912287_IlmnFwd	0	T	-	chr0	0
0	IlmnSeq_10:86912287_IlmnFwd_IlmnDup	0	T	-	chr0	0
0	IlmnSeq_10:86912383_IlmnFwd_IlmnDup	0	T	-	chr0	0
0	IlmnSeq_10:86917189_IlmnFwd	0	-	G	chr0	0
0	IlmnSeq_10:86917189_IlmnFwd_IlmnDup	0	-	G	chr0	0
0	IlmnSeq_10:86917322_IlmnFwd_IlmnDup	0	A	-	chr0	0
0	IlmnSeq_10:86919260_IlmnFwd	0	-	C	chr0	0
0	IlmnSeq_10:86921598_IlmnRev	0	TT	-	chr0	0
0	IlmnSeq_10:87864487_IlmnRev	0	T	-	chr0	0
0	IlmnSeq_10:87933059_IlmnRev	0	A	-	chr0	0
0	IlmnSeq_10:87933059_IlmnRev_IlmnDup	0	A	-	chr0	0
0	IlmnSeq_10:87933060_IlmnF2BTindel_IlmnRev	0	A	T	chr0	0
0	IlmnSeq_10:87933060_IlmnF2BTindel_IlmnRev_IlmnDup	0	A	T	chr0	0
0	IlmnSeq_10:87933063_IlmnRev	0	-	GGTTT	chr0	0
0	IlmnSeq_10:87933074-87933075_IlmnRev	0	-	CA	chr0	0
0	IlmnSeq_10:87933074-87933075_IlmnRev_IlmnDup	0	-	CA	chr0	0
0	IlmnSeq_10:87933074_IlmnRev	0	A	-	chr0	0
0	IlmnSeq_10:87933077_IlmnRev	0	T	-	chr0	0
0	IlmnSeq_10:87933145_IlmnFwd	0	-	G	chr0	0
0	IlmnSeq_10:87933249_IlmnFwd	0	AA	-	chr0	0
0	IlmnSeq_10:87957941_IlmnRev	0	-	CA	chr0	0
0	IlmnSeq_10:87957941_IlmnRev_IlmnDup	0	-	CA	chr0	0
0	IlmnSeq_10:87957959_IlmnRev	0	-	GT	chr0	0
0	IlmnSeq_10:87961088_IlmnFwd	0	A	-	chr0	0
0	IlmnSeq_12:32841150_IlmnRev	0	A	-	chr0	0
0	IlmnSeq_17:43092323_IlmnRev	0	CTTGAATGTTTTCATCACTGGAACCTATTTCATTAATACTGGAGCCCACTTCATTAGTA	-	chr0	0
0	IlmnSeq_19:11110765_IlmnFwd	0	TGCGAAGGTGATTCCCGGGTGGGACTGAGCCCTGGGCCCCCTCTGCGCTTCCTGACATGGCAACCAAACCCCTCATGCCTCAGTTTCCCCATCTGTTAAGTGTGCTTGAAAGCAGTTAGGAGGGTTTCATGAGATTCCACCTGCATGGAAAACTATCATTGGCTGGCCAGAGTTTCTTGCCTCTGGGGATTAGTAATTAAGAAATTTCAGGCCGGGTGCGTAATCCCTGTAATCCCAACACCTTGGGACGCCGAGGCGGGCAGATCACCTGAGGTCGGGAGTTCCAGACCAGCCTGACCAACATGGAGAAACCCCGTCTCTACTAAAAATACAAAATTAGCCGGGCTTGGTGGTGCATGCCTATAATCCCAGCTACTCAGGAGGCTGAGGCAGGAGAAT…	-	chr0	0
0	IlmnSeq_2:47409614_IlmnFwd	0	GGCCTCCCAAAGTGTTGGGATTACAGGCGTGAGCCACAGCACTCAGCCAGTTATTTTTTTATAAGAAAACATTTTACTGGCCAGGCCTGGTGGCTCACACCTGTAATCCCAGCACTTTGGGAGGCCGAGGCAGGCGGATCACGAGGTCAGGAGTTCGAGACCAGCCTGGCCAACATGGTGAAACCCCATCTCTACTAAAAATACAAAAATTAGCCAGGCGTGGTGGTGTGCGCCTGTATTCCCAGCTACTGGGGAGGCTGAAGCAGGAGAATCGATTGAACCCTTGAGGCAGAGGTTGCAGTGAGTTGAGATCGCACCATTGCACTCTAGCCTGGGTGACAGAGCAAGACTTCATCTCAAAAAAAAGAGAAAACATTTTATTAATAAGGTTCATAGAGT…	-	chr0	0
0	IlmnSeq_2:47429607_IlmnRev	0	GAGCCACTGCGCCCAGCAGATTCAAGCTTTTTAAATGGAATTTTGAGCTGATTTAGTTGAGACTTACGTGCTTAGTTGATAAATTTTAATTTTATACTAAAATATTTTACATTAATTCAAGTTAATTTATTTCAGATTGAATTTAGTGGAAGCTTTTGTAGAAGATGCAGAATTGAGGCAGACTTTACAAGAAGATTTACTTCGTCGATTCCCAGATCTTAACCGACTTGCCAAGAAGTTTCAAAGACAAGCAGCAAACTTACAAGATTGTTACCGACTCTATCAGGGTATAAATCAACTACCTAATGTTATACAGGCTCTGGAAAAACATGAAGGTAACAAGTGATTTTGTTTTTTTGTTTTCCTTCAACTCATACAATATATACTTGGCAATGTGCT…	-	chr0	0
0	IlmnSeq_2:47476409_IlmnRev	0	GGGTGATAGTACTCATGGCCCAAATTGGGTGTTTTGTGCCATGTGAGTCAGCAGAAGTGTCCAT	-	chr0	0
0	IlmnSeq_3:37020388_IlmnRev	0	CATCCTGGAGCGGGTGCAGCAGCACATCGAGAGCAAGCTCCTGGGCTCCAAT	-	chr0	0
0	IlmnSeq_7:5973530_IlmnFwd	0	T	-	chr0	0
0	IlmnSeq_7:5973530_IlmnRev	0	A	-	chr0	0
0	IlmnSeq_7:5977651_IlmnFwd	0	A	-	chr0	0
0	IlmnSeq_7:5977651_IlmnRev	0	T	-	chr0	0
0	IlmnSeq_7:5987452_IlmnRev	0	A	-	chr0	0
0	IlmnSeq_7:5987569_IlmnRev	0	A	-	chr0	0
0	IlmnSeq_rs387906419	0	A	G	chr0	0
0	IlmnSeq_rs72549354_ilmndup3	0	-	G	chr0	0
0	Ilmnseq_rs137853321_IlmnDup1	0	A	G	chr0	0
0	MINUS2-seq-rs774440500	0	A	-	chr0	0
0	TOP-rs4947534	0	A	G	chr0	0
0	TOP2-rs375491094_ilmndup1	0	C	G	chr0	0
0	TOP2-rs4947534	0	A	G	chr0	0
0	ilmnseq_10:96587204	0	A	G	chr0	0
0	ilmnseq_10:96587205	0	T	C	chr0	0
0	ilmnseq_10:96608408	0	A	T	chr0	0
0	ilmnseq_rs104894915_ilmndup1	0	A	C	chr0	0
0	ilmnseq_rs10942981	0	T	G	chr0	0
0	ilmnseq_rs111060774_ilmndup1	0	TCTTTACATGTAAAGC	-	chr0	0
0	ilmnseq_rs121913290	0	TT	-	chr0	0
0	ilmnseq_rs12863738_ilmndup1	0	T	C	chr0	0
0	ilmnseq_rs1799732_ilmnfwd	0	-	G	chr0	0
0	ilmnseq_rs200185441_ilmnbot	0	T	A	chr0	0
0	ilmnseq_rs2333227_F2BT	0	T	C	chr0	0
0	ilmnseq_rs372465406_ilmndup1	0	A	-	chr0	0
0	ilmnseq_rs386419947	0	A	G	chr0	0
0	ilmnseq_rs387906423	0	T	-	chr0	0
0	ilmnseq_rs397508192_ilmndup1	0	T	-	chr0	0
0	ilmnseq_rs57082577_ilmnfwd	0	ACC	-	chr0	0
0	ilmnseq_rs587776646	0	-	C	chr0	0
0	ilmnseq_rs587776672	0	-	C	chr0	0
0	ilmnseq_rs72549354_ilmndup2	0	-	G	chr0	0
0	ilmnseq_rs794729120	0	A	-	chr0	0
0	ilmnseq_rs864321644	0	A	-	chr0	0
0	ilmnseq_rs876659130	0	A	-	chr0	0
0	ilmnseq_rs878854591	0	-	G	chr0	0
0	ilmnseq_rs878854591_ilmndup1	0	-	G	chr0	0
0	ilmnseq_rs878854591_ilmndup2	0	-	G	chr0	0
0	ilmnseq_rs878854591_ilmndup3	0	-	G	chr0	0
0	ilmnseq_rs878854673	0	A	-	chr0	0
0	ilmnseq_rs9809219_F2BT	0	T	C	chr0	0
0	rs104894913	0	A	G	chr0	0
0	rs104894916	0	T	C	chr0	0
0	rs10988542	0	C	G	chr0	0
0	rs111033319	0	-	G	chr0	0
0	rs111060774	0	TCTTTACATGTAAAGC	-	chr0	0
0	rs11230328	0	G	C	chr0	0
0	rs113993949	0	A	G	chr0	0
0	rs113993952	0	T	A	chr0	0
0	rs11995572	0	A	C	chr0	0
0	rs12012747	0	A	G	chr0	0
0	rs121434621	0	A	G	chr0	0
0	rs121913289	0	A	-	chr0	0
0	rs121913290	0	TT	-	chr0	0
0	rs12912292	0	T	C	chr0	0
0	rs137853322	0	T	C	chr0	0
0	rs137853324	0	A	C	chr0	0
0	rs137853328	0	T	G	chr0	0
0	rs137853329	0	A	G	chr0	0
0	rs137853331	0	A	C	chr0	0
0	rs137853332	0	A	G	chr0	0
0	rs145489027	0	T	C	chr0	0
0	rs146650273	0	AAGT	-	chr0	0
0	rs146699004	0	-	GT	chr0	0
0	rs150346282	0	T	C	chr0	0
0	rs182004761	0	T	C	chr0	0
0	rs193302911	0	T	G	chr0	0
0	rs199476113	0	A	G	chr0	0
0	rs200536754	0	A	-	chr0	0
0	rs2738774	0	A	G	chr0	0
0	rs2787486	0	A	C	chr0	0
0	rs28935174	0	T	C	chr0	0
0	rs34113544	0	T	-	chr0	0
0	rs34995778	0	A	G	chr0	0
0	rs36204594	0	T	C	chr0	0
0	rs368983547	0	A	-	chr0	0
0	rs369437262	0	A	G	chr0	0
0	rs373178636	0	A	G	chr0	0
0	rs373399921	0	A	G	chr0	0
0	rs376451568	0	A	G	chr0	0
0	rs386134237	0	A	G	chr0	0
0	rs386134239	0	G	C	chr0	0
0	rs386134240	0	T	G	chr0	0
0	rs386134241	0	T	C	chr0	0
0	rs397514034	0	-	GA	chr0	0
0	rs4685408	0	T	C	chr0	0
0	rs587776646	0	-	C	chr0	0
0	rs587776672	0	-	C	chr0	0
0	rs587779301	0	ATTTC	-	chr0	0
0	rs587781910	0	GTGTCAG	-	chr0	0
0	rs6920364	0	C	G	chr0	0
0	rs71647871	0	A	G	chr0	0
0	rs773125	0	A	G	chr0	0
0	rs864321644	0	A	-	chr0	0
0	rs864622451	0	-	C	chr0	0
0	rs9526137	0	T	C	chr0	0
0	rs9872999	0	T	C	chr0	0
0	seq-rs10942981	0	T	G	chr0	0
0	seq-rs199476133	0	A	C	chr0	0
0	seq-rs397508192	0	T	-	chr0	0
0	seq-rs398123249	0	A	G	chr0	0
0	seq-rs730880889	0	-	CTTCCC	chr0	0
0	seq-rs774440500	0	A	-	chr0	0
0	seq-rs794729120	0	A	-	chr0	0
0	seq-rs797044656	0	A	-	chr0	0
1	IlmnSeq_17:43099552_IlmnFwd	0	TGAGCCACCATGCCTGGCCTCTTTTGCTCCCTTTTTAAAGTAAGATTCTTCAAGGTGGGAACTGCGTCTTTTACATTTTTTATAACTCACCATAGGGCTCATAAAATTCACTTCCCAAAGCTGCCTACCACAAATACAAATTATGACCAAGATTTTTGGCAAAACTATAAGATAAGGAATCCAGCAATTATTATTAAATACTTAAAAAACCTGAGACCCTTACCCAATTCAATGTAGACAGACGTCTTTTGAGGTTGTATCCGCTGCTTTGTCCTCAGAGTTCTCACAGTTCCAAGGTTAGAGAGTTGGACACTGAGACTGGTTTCCTGCTAAACAGTATGGTAAAGAACAGTCAAGCAATTGTTGGCCAGTTCTGTGCTTTTCCTCCTGAAGAGAAAC…	-	chr0	0
1	IlmnSeq_17:43099552_IlmnFwd_IlmnDup	0	TGAGCCACCATGCCTGGCCTCTTTTGCTCCCTTTTTAAAGTAAGATTCTTCAAGGTGGGAACTGCGTCTTTTACATTTTTTATAACTCACCATAGGGCTCATAAAATTCACTTCCCAAAGCTGCCTACCACAAATACAAATTATGACCAAGATTTTTGGCAAAACTATAAGATAAGGAATCCAGCAATTATTATTAAATACTTAAAAAACCTGAGACCCTTACCCAATTCAATGTAGACAGACGTCTTTTGAGGTTGTATCCGCTGCTTTGTCCTCAGAGTTCTCACAGTTCCAAGGTTAGAGAGTTGGACACTGAGACTGGTTTCCTGCTAAACAGTATGGTAAAGAACAGTCAAGCAATTGTTGGCCAGTTCTGTGCTTTTCCTCCTGAAGAGAAAC…	-	chr0	0
1	rs9701055	565433	T	C	chr1	630053
1	rs9651229	567667	T	C	chr1	632287
1	ilmnseq_rs9701872_ilmndup1	568208	T	C	chr1	632828
1	rs9701872	568208	T	C	chr1	632828
1	rs11497407	568527	A	G	chr1	633147
1	GSA-rs116587930	727841	A	G	chr1	792461
1	rs3131972	752721	A	G	chr1	817341
1	GSA-rs200599638	752918	T	G	chr1	817538
1	GSA-rs114525117	759036	A	G	chr1	823656
1	rs12127425	794332	A	G	chr1	858952
1	GSA-rs79373928	801536	T	G	chr1	866156
1	GSA-rs116452738	834830	A	G	chr1	899450
1	GSA-rs72631887	835092	T	G	chr1	899712
1	rs4970383	838555	A	C	chr1	903175
1	rs28678693	838665	T	C	chr1	903285
1	rs4970382	840753	T	C	chr1	905373
1	GSA-rs4475691	846808	T	C	chr1	911428
1	GSA-rs72631889	851390	T	G	chr1	916010
1	rs7537756	854250	A	G	chr1	918870
1	rs13302982	861808	A	G	chr1	926428
1	GSA-rs376747791	863130	A	G	chr1	927750
1	rs146331776	865705	T	C	chr1	930325
1	chr1-866429	866429	T	C	chr1	931049
1	rs2880024	866893	T	C	chr1	931513
1	rs13302914	868404	T	C	chr1	933024
1	rs76723341	872952	T	C	chr1	937572
1	GSA-rs148327885	878331	T	C	chr1	942951
1	GSA-rs143853699	879911	A	G	chr1	944531
1	chr1-881003	881003	A	G	chr1	945623
1	rs2272757	881627	A	G	chr1	946247
1	GSA-rs67274836	884767	A	G	chr1	949387
1	rs150127608	888563	T	C	chr1	953183
1	rs3748597	888659	T	C	chr1	953279
1	GSA-rs3828049	889238	A	G	chr1	953858
1	GSA-rs77608078	891277	T	C	chr1	955897
1	exm2264981	894573	A	G	chr1	959193
1	rs13303229	897564	T	C	chr1	962184
1	rs3935066	900730	A	G	chr1	965350
1	rs6669800	903321	A	G	chr1	967941
1	rs35241590	904752	T	C	chr1	969372
1	rs148853412	909875	A	G	chr1	974495
1	rs147228085	909917	A	G	chr1	974537
1	rs28561399	910473	A	G	chr1	975093
1	GSA-rs3748588	911101	T	C	chr1	975721
1	chr1-914572	914572	A	G	chr1	979192
1	GSA-rs186101910	914749	T	C	chr1	979369
1	rs41285816	917640	A	G	chr1	982260
1	rs2341354	918573	A	G	chr1	983193
1	rs6605059	919419	T	C	chr1	984039
1	rs4970414	919501	T	G	chr1	984121
1	rs116781904	919855	A	G	chr1	984475
1	GSA-rs61770779	919927	A	G	chr1	984547
1	chr1-935071	935071	T	C	chr1	999691
1	rs202075563	949472	A	G	chr1	1014092
1	rs148041041	949491	A	G	chr1	1014111
1	ilmnseq_rs201073369_ilmntop	955619	G	C	chr1	1020239
1	rs2799064	957898	T	G	chr1	1022518
1	rs28591569	959509	T	G	chr1	1024129
1	rs140954236	970687	T	C	chr1	1035307
1	rs3121578	974894	T	C	chr1	1039514
1	ilmnseq_rs544749044	976059	T	C	chr1	1040679
1	rs199563268	978642	A	G	chr1	1043262
1	rs138288952	978762	A	G	chr1	1043382
1	rs144164397	978804	T	C	chr1	1043424
1	rs79016973	978974	A	G	chr1	1043594
1	rs143324306	979397	A	G	chr1	1044017
1	rs113288277	979748	T	A	chr1	1044368
1	seq-rs112039851	980824	C	G	chr1	1045444
1	rs146243145	980868	A	G	chr1	1045488
1	rs200684031	981139	A	G	chr1	1045759
1	rs202061838	981244	A	G	chr1	1045864
1	rs149268246	982968	T	C	chr1	1047588
1	rs148430436	982969	A	G	chr1	1047589
1	rs149762107	983005	A	G	chr1	1047625
1	rs148948883	983040	A	G	chr1	1047660
1	rs142620337	983243	T	C	chr1	1047863
1	rs536657086	983256	T	C	chr1	1047876
1	GSA-rs111818381	984971	A	G	chr1	1049591
1	rs2275811	985460	T	C	chr1	1050080
1	rs143143061	985905	T	C	chr1	1050525
1	rs145444272	986165	A	G	chr1	1050785
1	rs144245019	986732	A	G	chr1	1051352
1	rs72900459	986918	T	C	chr1	1051538
1	rs145116277	986963	T	C	chr1	1051583
1	rs139415524	987191	A	G	chr1	1051811
1	GSA-rs113261977	987253	T	C	chr1	1051873
1	GSA-rs74223856	988902	A	C	chr1	1053522
1	rs2465136	990417	T	C	chr1	1055037
1	rs7526076	998395	A	G	chr1	1063015
1	GSA-rs113592356	1004331	T	C	chr1	1068951
1	rs9442372	1018704	A	G	chr1	1083324
1	rs139896904	1019383	T	C	chr1	1084003
1	chr1-1019454	1019454	A	G	chr1	1084074
1	rs41285818	1019841	A	G	chr1	1084461
1	GSA-rs115723010	1022223	A	G	chr1	1086843
1	GSA-rs114326054	1022423	A	G	chr1	1087043
1	GSA-rs61766340	1023114	A	G	chr1	1087734
1	rs12132100	1023788	T	C	chr1	1088408
1	rs72910128	1026359	A	G	chr1	1090979
1	GSA-rs116334314	1026428	A	G	chr1	1091048
1	GSA-rs115662838	1026913	T	C	chr1	1091533
1	GSA-rs77334480	1027888	T	C	chr1	1092508
1	rs12731175	1030374	A	G	chr1	1094994
1	rs9651273	1031540	A	G	chr1	1096160
1	rs6671356	1040026	T	C	chr1	1104646
1	GSA-rs147606383	1045331	A	G	chr1	1109951
1	rs12080505	1045606	A	C	chr1	1110226
1	GSA-rs61766344	1054091	T	C	chr1	1118711
1	rs9442373	1062638	A	C	chr1	1127258
1	rs4072537	1065296	T	C	chr1	1129916
1	GSA-rs11260598	1065726	T	C	chr1	1130346
1	rs61766346	1068883	A	G	chr1	1133503
1	rs139475585	1070467	A	G	chr1	1135087
1	rs141230226	1072181	T	C	chr1	1136801
1	rs11260603	1079198	T	C	chr1	1143818
1	GSA-rs116661896	1079261	A	G	chr1	1143881
1	GSA-rs74045142	1092071	A	C	chr1	1156691
1	GSA-rs77791262	1092205	T	G	chr1	1156825
1	GSA-rs57527288	1092563	T	G	chr1	1157183
1	rs61768477	1095130	T	C	chr1	1159750
1	rs9442385	1097335	T	G	chr1	1161955
1	rs76051810	1099840	A	G	chr1	1164460
1	GSA-rs61768480	1103150	A	G	chr1	1167770
1	GSA-rs112695918	1104584	T	C	chr1	1169204
1	rs11260542	1110019	A	G	chr1	1174639
1	GSA-rs79295821	1110557	T	C	chr1	1175177
1	rs6671609	1112982	T	C	chr1	1177602
1	GSA-rs12092254	1113121	A	G	chr1	1177741
1	GSA-rs111751804	1115503	T	C	chr1	1180123
1	GSA-rs114390380	1115548	A	G	chr1	1180168
1	chr1-1115954	1115954	T	C	chr1	1180574
1	GSA-rs111290899	1118578	A	G	chr1	1183198
1	chr1-1119410	1119410	A	G	chr1	1184030
1	GSA-rs77051049	1119546	T	G	chr1	1184166
1	rs146121068	1120421	T	C	chr1	1185041
1	rs1320571	1120431	A	G	chr1	1185051
1	rs77950429	1120536	A	G	chr1	1185156
1	GSA-rs115516254	1127561	T	C	chr1	1192181
1	rs10907175	1130727	A	C	chr1	1195347
1	chr1-1131791	1131791	T	C	chr1	1196411
1	rs11466695	1139216	A	G	chr1	1203836
1	chr1-1139417	1139417	A	G	chr1	1204037
1	chr1-1140851	1140851	T	C	chr1	1205471
1	rs72894038	1141765	T	C	chr1	1206385
1	GSA-rs3753350	1144196	T	C	chr1	1208816
1	chr1-1153944	1153944	T	G	chr1	1218564
1	chr1-1154335	1154335	A	G	chr1	1218955
1	rs3813199	1158277	A	G	chr1	1222897
1	GSA-rs76888271	1158357	A	G	chr1	1222977
1	rs11260562	1165310	A	G	chr1	1229930
1	rs142820961	1168115	A	C	chr1	1232735
1	GSA-rs3813196	1169381	T	C	chr1	1234001
1	rs6603782	1171417	T	C	chr1	1236037
1	chr1-1178854	1178854	T	C	chr1	1243474
1	GSA-rs12093154	1178925	A	G	chr1	1243545
1	chr1-1179619	1179619	A	C	chr1	1244239
1	rs78446752	1183397	T	C	chr1	1248017
1	1:1183442	1183442	A	G	chr1	1248062
1	GSA-rs116866065	1189605	A	G	chr1	1254225
1	rs1058161	1190523	T	C	chr1	1255143
1	GSA-rs114569858	1195883	A	G	chr1	1260503
1	GSA-rs72894077	1196374	T	C	chr1	1260994
1	chr1-1197693	1197693	A	G	chr1	1262313
1	rs4018608	1203938	T	C	chr1	1268558
1	GSA-rs76370872	1210744	A	G	chr1	1275364
1	GSA-rs74950664	1215260	T	C	chr1	1279880
1	chr1-1216877	1216877	T	C	chr1	1281497
1	chr1-1216897	1216897	A	G	chr1	1281517
1	rs6603788	1218086	T	C	chr1	1282706
1	GSA-rs114027205	1218655	T	C	chr1	1283275
1	rs2144440	1220136	A	G	chr1	1284756
1	rs12751100	1220954	A	G	chr1	1285574
1	GSA-rs11260578	1221138	A	G	chr1	1285758
1	rs146233203	1221409	A	G	chr1	1286029
1	GSA-rs111819661	1222958	T	C	chr1	1287578
1	rs137911309	1225697	T	C	chr1	1290317
1	rs79943571	1225899	A	G	chr1	1290519
1	rs3737721	1227897	A	G	chr1	1292517
1	GSA-rs117919883	1233576	A	G	chr1	1298196
1	GSA-rs370042082	1234137	T	G	chr1	1298757
1	GSA-rs145087137	1238583	A	G	chr1	1303203
1	GSA-rs74564044	1239797	A	G	chr1	1304417
1	GSA-rs77641120	1239847	T	C	chr1	1304467
1	rs145899282	1246022	A	G	chr1	1310642
1	chr1-1246069	1246069	A	G	chr1	1310689
1	rs12103	1247494	T	C	chr1	1312114
1	rs144825920	1247736	T	C	chr1	1312356
1	chr1-1247866	1247866	A	G	chr1	1312486
1	chr1-1248974	1248974	T	C	chr1	1313594
1	chr1-1250794	1250794	A	G	chr1	1315414
1	GSA-rs148575933	1251271	T	G	chr1	1315891
1	rs62623580	1254255	A	G	chr1	1318875
1	chr1-1256453	1256453	A	G	chr1	1321073
1	rs3845293	1258246	A	C	chr1	1322866
1	chr1-1262701	1262701	A	G	chr1	1327321
1	GSA-rs150672559	1263085	A	G	chr1	1327705
1	rs144594741	1267040	T	G	chr1	1331660
1	rs76584377	1267291	G	C	chr1	1331911
1	rs373399503.2	1267441	T	G	chr1	1332061
1	rs200097416	1267539	A	G	chr1	1332159
1	rs181719474	1267582	A	G	chr1	1332202
1	rs143359998	1268017	A	G	chr1	1332637
1	chr1-1268300	1268300	A	G	chr1	1332920
1	chr1-1268505	1268505	A	G	chr1	1333125
1	rs201675765	1269219	T	C	chr1	1333839
1	chr1-1269288	1269288	A	G	chr1	1333908
1	rs149196451	1269503	G	C	chr1	1334123
1	GSA-rs307377	1269554	T	C	chr1	1334174
1	GSA-rs72634803	1270132	A	G	chr1	1334752
1	GSA-rs77443780	1272858	T	C	chr1	1337478
1	rs797044837	1273381	T	-	chr1	1338001
1	ilmnseq_rs797044833_MNV_ilmndup1	1273425	A	G	chr1	1338045
1	rs797044834	1273479	GGGGCAGCCGGGT	-	chr1	1338099
1	seq-rs797044834	1273479	GGGGCAGCCGGGT	-	chr1	1338099
1	seq-rs797044836	1273488	-	G	chr1	1338108
1	seq-rs797044836_ilmndup1	1273488	-	G	chr1	1338108
1	rs150617550	1277179	T	C	chr1	1341799
1	rs145496306	1277833	A	G	chr1	1342453
1	rs141809370	1289863	A	C	chr1	1354483
1	rs76022438	1302995	A	G	chr1	1367615
1	GSA-rs17160669	1305561	T	C	chr1	1370181
1	GSA-rs150194697	1309405	T	C	chr1	1374025
1	rs2260423	1314707	A	G	chr1	1379327
1	rs34429643	1316247	A	G	chr1	1380867
1	GSA-rs4970443	1316887	A	G	chr1	1381507
1	rs1240707	1335302	T	C	chr1	1399922
1	chr1-1335421	1335421	T	G	chr1	1400041
1	rs1240708	1335790	A	G	chr1	1400410
1	rs149740769	1336098	A	G	chr1	1400718
1	chr1-1337543	1337543	A	G	chr1	1402163
1	rs17160977	1341185	A	G	chr1	1405805
1	chr1-1341238	1341238	T	C	chr1	1405858
1	chr1-1341254	1341254	A	G	chr1	1405874
1	GSA-rs11548045	1342394	A	G	chr1	1407014
1	GSA-rs187909141	1353400	A	C	chr1	1418020
1	rs138985554	1361130	T	C	chr1	1425750
1	GSA-rs143000156	1365759	A	G	chr1	1430379
1	chr1-1372327	1372327	T	C	chr1	1436947
1	chr1-1372791	1372791	T	C	chr1	1437411
1	rs3843249	1373373	A	G	chr1	1437993
1	GSA-rs35368272	1374436	T	C	chr1	1439056
1	rs78727284	1377535	A	G	chr1	1442155
1	GSA-rs149262155	1386089	T	C	chr1	1450709
1	GSA-rs137900170	1392325	A	G	chr1	1456945
1	GSA-rs138988486	1394069	T	C	chr1	1458689
1	rs111938039	1400170	A	G	chr1	1464790
1	GSA-rs182336567	1404796	T	C	chr1	1469416
1	rs146343349	1412659	T	G	chr1	1477279
1	rs141143061	1417927	T	C	chr1	1482547
1	GSA-1:1425512	1425512	T	C	chr1	1490132
1	chr1-1425737	1425737	T	G	chr1	1490357
1	rs145313947	1425753	T	C	chr1	1490373
1	chr1-1430940	1430940	T	C	chr1	1495560
1	chr1-1430943	1430943	T	C	chr1	1495563
1	chr1-1430946	1430946	T	C	chr1	1495566
1	GSA-rs6688651	1433495	T	C	chr1	1498115
1	rs111509968	1446390	T	G	chr1	1511010
1	rs6690515	1447325	A	G	chr1	1511945
1	rs139049688	1449501	A	G	chr1	1514121
1	GSA-rs6669795	1450947	A	C	chr1	1515567
1	rs7531221	1453373	A	G	chr1	1517993
1	rs201292180	1454325	T	C	chr1	1518945
1	chr1-1460672	1460672	A	G	chr1	1525292
1	rs200101143	1464604	T	C	chr1	1529224
1	rs12032637	1465382	A	G	chr1	1530002
1	rs79463926	1467322	T	G	chr1	1531942
1	rs606231451	1470752	A	G	chr1	1535372
1	GSA-rs146206869	1470807	T	C	chr1	1535427
1	rs187039783	1471017	T	C	chr1	1535637
1	GSA-rs75437521	1483625	A	G	chr1	1548245
1	rs2031709	1485984	A	C	chr1	1550604
1	GSA-rs1887284	1487059	A	G	chr1	1551679
1	rs7531530	1489670	T	C	chr1	1554290
1	chr1-1499929	1499929	A	G	chr1	1564549
1	rs144526445	1499944	A	G	chr1	1564564
1	GSA-rs4970458	1500925	A	G	chr1	1565545
1	GSA-1:1501061	1501061	A	G	chr1	1565681
1	GSA-rs77167259	1501089	A	G	chr1	1565709
1	rs116304796	1510408	T	G	chr1	1575028
1	GSA-rs77661767	1510724	T	C	chr1	1575344
1	rs114517777	1512885	T	C	chr1	1577505
1	rs4648786	1521805	A	G	chr1	1586425
1	GSA-rs61774870	1525437	A	G	chr1	1590057
1	chr1-1534756	1534756	T	G	chr1	1599376
1	1:1542721	1542721	A	C	chr1	1607341
1	GSA-rs74223870	1543050	T	C	chr1	1607670
1	rs28703654	1543311	A	G	chr1	1607931
1	chr1-1551945	1551945	T	C	chr1	1616565
1	rs12725787	1555396	T	C	chr1	1620016
1	GSA-rs78656035	1555718	A	G	chr1	1620338
1	GSA-rs117366726	1558267	T	C	chr1	1622887
1	rs28635343	1560103	T	C	chr1	1624723
1	GSA-rs117489126	1561051	T	C	chr1	1625671
1	chr1-1586842	1586842	A	C	chr1	1655388
1	chr1-1597295	1597295	T	C	chr1	1665856
1	rs7532034	1603163	T	C	chr1	1671724
1	rs9442411	1619767	T	C	chr1	1688328
1	chr1-1647858	1647858	A	G	chr1	1716419
1	chr1-1650796	1650796	T	C	chr1	1719357
1	rs200755605	1650844	T	C	chr1	1719405
1	rs201091435	1650885	T	A	chr1	1719446
1	exm2268858	1664124	T	C	chr1	1732685
1	GSA-rs373908706	1673175	T	C	chr1	1741736
1	rs1014988	1680219	A	G	chr1	1748780
1	rs75816936	1686081	A	G	chr1	1754642
1	rs2076327	1686962	T	C	chr1	1755523
1	GSA-rs72634841	1688096	T	C	chr1	1756657
1	chr1-1688550	1688550	T	C	chr1	1757111
1	GSA-rs78804397	1689225	T	C	chr1	1757786
1	rs112952700	1689837	T	C	chr1	1758398
1	GSA-rs111366931	1692989	A	G	chr1	1761550
1	rs17162855	1695831	T	C	chr1	1764392
1	GSA-rs144596499	1703545	T	G	chr1	1772106
1	GSA-rs6603811	1706136	T	C	chr1	1774697
1	rs742359	1715011	A	C	chr1	1783572
1	rs10907185	1733219	A	G	chr1	1801780
1	rs869312825	1735987	T	C	chr1	1804548
1	rs752746786	1737942	A	G	chr1	1806503
1	GSA-rs115507312	1749412	T	G	chr1	1817973
1	GSA-rs114622732	1766856	A	G	chr1	1835417
1	rs4648727	1776269	A	C	chr1	1844830
1	GSA-rs115361377	1777077	T	C	chr1	1845638
1	rs7525092	1810090	T	C	chr1	1878651
1	rs28710181	1847531	T	C	chr1	1916092
1	rs140177117	1847952	A	G	chr1	1916513
1	rs147568087	1847968	T	G	chr1	1916529
1	rs74773083	1848197	C	G	chr1	1916758
1	rs200415259	1848206	A	C	chr1	1916767
1	chr1-1848231	1848231	A	G	chr1	1916792
1	rs111582404	1848601	T	C	chr1	1917162
1	chr1-1848627	1848627	T	C	chr1	1917188
1	chr1-1849691	1849691	T	C	chr1	1918252
1	chr1-1849952	1849952	T	C	chr1	1918513
1	GSA-rs28633659	1854546	T	C	chr1	1923107
1	rs752965	1856098	T	C	chr1	1924659
1	GSA-rs45489198	1859176	T	C	chr1	1927737
1	GSA-rs60609500	1860997	A	G	chr1	1929558
1	rs141833643	1861581	A	C	chr1	1930142
1	chr1-1861699	1861699	T	C	chr1	1930260
1	rs2803316	1865298	A	G	chr1	1933859
1	chr1-1870337	1870337	T	C	chr1	1938898
1	chr1-1875803	1875803	T	C	chr1	1944364
1	rs2803337	1875859	A	G	chr1	1944420
1	GSA-rs4648597	1881361	T	C	chr1	1949922
1	GSA-rs192231857	1881490	T	C	chr1	1950051
1	1:1884055	1884055	A	C	chr1	1952616
1	rs28624830	1885769	A	G	chr1	1954330
1	GSA-rs76385183	1886370	A	G	chr1	1954931
1	GSA-rs3795289	1886863	T	C	chr1	1955424
1	rs28548017	1887019	A	G	chr1	1955580
1	chr1-1888057	1888057	A	G	chr1	1956618
1	rs3820011	1888193	A	C	chr1	1956754
1	rs78927713	1891034	T	C	chr1	1959595
1	rs28446828	1891156	T	C	chr1	1959717
1	rs144739795	1897832	T	C	chr1	1966393
1	rs4648601	1899861	T	C	chr1	1968422
1	rs16824588	1900232	T	C	chr1	1968793
1	GSA-rs17777942	1906789	T	C	chr1	1975350
1	GSA-rs74046262	1906804	A	G	chr1	1975365
1	GSA-rs115193218	1907739	T	C	chr1	1976300
1	rs4648746	1914487	A	G	chr1	1983048
1	rs13303332	1923129	A	G	chr1	1991690
1	GSA-rs6662278	1923507	T	C	chr1	1992068
1	rs6605081	1930754	T	C	chr1	1999315
1	rs28706276	1933267	A	G	chr1	2001828
1	rs28550169	1939826	T	C	chr1	2008387
1	GSA-rs6656398	1941929	A	G	chr1	2010490
1	rs13303016	1946591	A	G	chr1	2015152
1	GSA-rs72636353	1954179	A	G	chr1	2022740
1	rs139300921	1959698	T	C	chr1	2028259
1	rs16824627	1962633	A	G	chr1	2031194
1	GSA-rs117504198	1964852	T	G	chr1	2033413
1	GSA-rs3128310	1966453	T	C	chr1	2035014
1	rs115492961	1967404	A	G	chr1	2035965
1	GSA-rs55977422	1969601	A	G	chr1	2038162
1	GSA-rs74372554	1969752	T	C	chr1	2038313
1	GSA-rs188382475	1974254	T	C	chr1	2042815
1	rs6661694	1978655	A	G	chr1	2047216
1	GSA-rs61709121	1979842	A	G	chr1	2048403
1	rs28668690	1985705	A	G	chr1	2054266
1	GSA-rs148023796	1986252	A	G	chr1	2054813
1	GSA-rs3121828	1986754	T	G	chr1	2055315
1	chr1-1987921	1987921	A	G	chr1	2056482
1	GSA-rs1878747	1991162	A	G	chr1	2059723
1	GSA-rs75246334	1992431	A	G	chr1	2060992
1	GSA-rs4454477	2000337	A	G	chr1	2068898
1	GSA-rs28652946	2008688	T	C	chr1	2077249
1	GSA-rs78305720	2008959	A	C	chr1	2077520
1	GSA-rs78645774	2009294	T	C	chr1	2077855
1	GSA-rs2803346	2011958	A	G	chr1	2080519
1	rs13303130	2019070	A	G	chr1	2087631
1	GSA-rs181128189	2020224	A	G	chr1	2088785
1	rs13303198	2020905	T	C	chr1	2089466
1	GSA-rs2459995	2024256	A	G	chr1	2092817
1	GSA-rs61775407	2028060	T	C	chr1	2096621
1	rs908743	2038824	A	G	chr1	2107385
1	rs4648808	2040936	T	C	chr1	2109497
1	GSA-rs76198274	2044962	T	C	chr1	2113523
1	rs3107146	2047584	T	C	chr1	2116145
1	rs11589827	2055856	A	G	chr1	2124417
1	rs56260599	2056115	A	G	chr1	2124676
1	GSA-rs12744596	2067708	A	G	chr1	2136269
1	rs425277	2069172	T	C	chr1	2137733
1	rs424079	2071340	A	C	chr1	2139901
1	GSA-rs79612780	2071700	A	G	chr1	2140261
1	rs142085528	2075740	A	G	chr1	2144301
1	rs385039	2077409	A	G	chr1	2145970
1	rs34944978	2082829	A	G	chr1	2151390
1	GSA-rs75515273	2091762	T	C	chr1	2160323
1	GSA-rs115113197	2093124	A	G	chr1	2161685
1	GSA-rs61776610	2098512	A	G	chr1	2167073
1	GSA-rs12137653	2099882	A	G	chr1	2168443
1	GSA-rs11587831	2110848	T	G	chr1	2179409
1	chr1-2116872	2116872	T	C	chr1	2185433
1	chr1-2117559	2117559	A	G	chr1	2186120
1	chr1-2129582	2129582	T	C	chr1	2198143
1	rs142593122	2130234	T	C	chr1	2198795
1	rs190527875	2130276	T	C	chr1	2198837
1	chr1-2130277	2130277	A	G	chr1	2198838
1	rs182979463	2130352	A	C	chr1	2198913
1	chr1-2130415	2130415	T	C	chr1	2198976
1	GSA-rs115111747	2139916	T	C	chr1	2208477
1	GSA-rs72637878	2142496	T	C	chr1	2211057
1	chr1-2144374	2144374	T	G	chr1	2212935
1	chr1-2144629	2144629	T	C	chr1	2213190
1	chr1-2144800	2144800	A	G	chr1	2213361
1	chr1-2144880	2144880	T	C	chr1	2213441
1	GSA-1:2145254	2145254	T	C	chr1	2213815
1	rs387907304	2160299	G	C	chr1	2228860
1	seq-rs387907306	2160305	A	G	chr1	2228866
1	seq-rs387907306.1	2160305	T	G	chr1	2228866
1	rs387907305	2160306	A	G	chr1	2228867
1	IlmnSeq_rs397514590_ilmndup1	2160308	T	C	chr1	2228869
1	ilmnseq_rs756778048	2160421	T	C	chr1	2228982
1	rs398122889	2160488	-	GACCGCTCC	chr1	2229049
1	seq-rs863223723	2160551	A	G	chr1	2229112
1	rs387907303	2160552	A	G	chr1	2229113
1	rs149642284	2161003	T	C	chr1	2229564
1	GSA-rs262680	2167149	T	C	chr1	2235710
1	rs867635	2168604	T	C	chr1	2237165
1	GSA-rs10910033	2173179	A	G	chr1	2241740
1	GSA-rs114462818	2184755	T	C	chr1	2253316
1	GSA-rs77797313	2186115	A	G	chr1	2254676
1	rs12084736	2189580	T	C	chr1	2258141
1	rs10910045	2205527	A	G	chr1	2274088
1	rs12047069	2205548	A	C	chr1	2274109
1	rs12045693	2205581	A	C	chr1	2274142
1	GSA-rs3795275	2209780	A	G	chr1	2278341
1	rs4648821	2216368	T	G	chr1	2284929
1	rs6689315	2216391	A	G	chr1	2284952
1	rs12119470	2218100	T	C	chr1	2286661
1	rs59476564	2218129	T	C	chr1	2286690
1	rs2643884	2220425	T	C	chr1	2288986
1	GSA-rs2017143	2220649	T	C	chr1	2289210
1	rs884940	2223866	T	C	chr1	2292427
1	rs2889408	2225251	T	C	chr1	2293812
1	rs1532385	2225284	A	G	chr1	2293845
1	rs12024136	2225412	T	C	chr1	2293973
1	rs1496555	2234251	A	G	chr1	2302812
1	rs199634070	2234410	A	G	chr1	2302971
1	rs150934009	2234480	A	G	chr1	2303041
1	rs75280988	2234791	T	C	chr1	2303352
1	rs141862996	2234824	T	C	chr1	2303385
1	rs370921440	2235271	T	C	chr1	2303832
1	rs201613746	2235388	T	C	chr1	2303949
1	GSA-rs58351713	2237020	T	G	chr1	2305581
1	rs773151547	2237581	T	C	chr1	2306142
1	GSA-rs116161617	2238727	A	G	chr1	2307288
1	GSA-rs79907870	2240074	A	G	chr1	2308635
1	rs2843157	2240383	T	C	chr1	2308944
1	GSA-rs76930616	2249577	A	G	chr1	2318138
1	rs12082516	2251160	T	C	chr1	2319721
1	GSA-rs74554258	2251822	A	G	chr1	2320383
1	GSA-rs72642142	2253369	A	C	chr1	2321930
1	GSA-rs190722062	2254082	A	G	chr1	2322643
1	GSA-rs115750325	2254558	T	C	chr1	2323119
1	GSA-rs189303382	2256217	T	G	chr1	2324778
1	rs2643893	2257727	T	C	chr1	2326288
1	rs2645065	2261222	A	C	chr1	2329783
1	GSA-rs78615410	2265958	T	C	chr1	2334519
1	GSA-rs56298931	2270170	A	G	chr1	2338731
1	rs12730050	2273144	A	G	chr1	2341705
1	rs1472319	2273905	T	C	chr1	2342466
1	GSA-rs72920968	2277392	A	G	chr1	2345953
1	GSA-rs2055204	2280661	A	G	chr1	2349222
1	rs7527871	2281726	A	C	chr1	2350287
1	rs4648831	2283117	T	C	chr1	2351678
1	rs2840526	2283266	T	C	chr1	2351827
1	rs2645087	2288852	A	G	chr1	2357413
1	chr1-2290119	2290119	T	C	chr1	2358680
1	rs2643891	2292352	A	G	chr1	2360913
1	GSA-rs114820209	2294349	T	C	chr1	2362910
1	GSA-rs77793792	2301212	T	C	chr1	2369773
1	rs2840535	2301609	T	G	chr1	2370170
1	rs10910061	2303512	A	G	chr1	2372073
1	rs116550976	2304000	T	G	chr1	2372561
1	rs56199918	2305918	T	C	chr1	2374479
1	rs2279703	2306695	T	C	chr1	2375256
1	rs12070746	2308029	A	G	chr1	2376590
1	rs189521987	2310551	T	C	chr1	2379112
1	rs61760819	2311393	A	G	chr1	2379954
1	GSA-rs2643908	2312395	T	C	chr1	2380956
1	GSA-rs115217673	2315032	A	G	chr1	2383593
1	chr1-2316488	2316488	T	C	chr1	2385049
1	rs3736331	2318653	A	G	chr1	2387214
1	GSA-rs72642184	2325548	A	G	chr1	2394109
1	GSA-rs4648838	2329212	A	G	chr1	2397773
1	rs3001344	2329808	A	G	chr1	2398369
1	rs6693447	2330190	T	G	chr1	2398751
1	GSA-rs75262920	2331139	A	G	chr1	2399700
1	GSA-rs55746053	2337560	A	G	chr1	2406121
1	rs35082957	2337992	T	C	chr1	2406553
1	rs61752093	2338020	AG	-	chr1	2406581
1	rs61750435	2338230	T	-	chr1	2406791
1	rs139345520	2338250	C	G	chr1	2406811
1	rs2494427	2338569	T	C	chr1	2407130
1	GSA-rs58827215	2338658	A	G	chr1	2407219
1	rs2494429	2339395	A	G	chr1	2407956
1	rs146452560	2340173	T	C	chr1	2408734
1	rs375032738	2340302	A	G	chr1	2408863
1	rs61760854	2341060	T	C	chr1	2409621
1	GSA-rs80045357	2348983	A	G	chr1	2417544
1	rs3935659	2351699	T	C	chr1	2420260
1	rs12731309	2352146	T	C	chr1	2420707
1	GSA-rs75884450	2353116	T	C	chr1	2421677
1	GSA-rs75236747	2353972	T	C	chr1	2422533
1	rs12118145	2355223	T	C	chr1	2423784
1	rs67532508	2355400	A	G	chr1	2423961
1	GSA-rs114573763	2357367	T	C	chr1	2425928
1	rs2494641	2362827	T	C	chr1	2431388
1	rs2494639	2368775	T	C	chr1	2437336
1	rs61763907	2369021	T	C	chr1	2437582
1	rs2494425	2372858	T	C	chr1	2441419
1	GSA-rs76228524	2372874	T	C	chr1	2441435
1	rs74049259	2372940	T	C	chr1	2441501
1	rs12563838	2374120	T	C	chr1	2442681
1	GSA-rs12406368	2380384	T	C	chr1	2448945
1	rs4648845	2387101	T	C	chr1	2455662
1	rs4648846	2389152	A	G	chr1	2457713
1	rs2477686	2392648	C	G	chr1	2461209
1	GSA-rs79868541	2401668	T	C	chr1	2470229
1	GSA-rs117704179	2410698	A	G	chr1	2479259
1	GSA-rs115810747	2413166	A	G	chr1	2481727
1	rs10910082	2418935	T	C	chr1	2487496
1	GSA-rs140711939	2420233	T	G	chr1	2488794
1	chr1-2422775	2422775	A	G	chr1	2491336
1	GSA-rs148922747	2425665	A	G	chr1	2494226
1	GSA-rs374836012	2426865	T	C	chr1	2495426
1	rs140865768	2434464	T	C	chr1	2503025
1	GSA-rs114371513	2435738	A	G	chr1	2504299
1	GSA-rs75875515	2441020	A	G	chr1	2509581
1	GSA-rs117214274	2441060	T	C	chr1	2509621
1	GSA-rs2494620	2441358	T	C	chr1	2509919
1	GSA-rs76591030	2444953	T	C	chr1	2513514
1	GSA-rs116387284	2449924	A	G	chr1	2518485
1	rs2494625	2454709	T	C	chr1	2523270
1	GSA-rs118152794	2454865	A	G	chr1	2523426
1	GSA-rs12131236	2455862	T	C	chr1	2524423
1	GSA-rs1980789	2455863	A	C	chr1	2524424
1	GSA-rs115638831	2460564	T	C	chr1	2529125
1	rs11584295	2465329	A	G	chr1	2533890
1	GSA-rs2985861	2466377	T	C	chr1	2534938
1	GSA-rs72644662	2468726	T	C	chr1	2537287
1	GSA-rs3001341	2469512	A	G	chr1	2538073
1	GSA-1:2486696	2486696	T	C	chr1	2555257
1	rs2234167	2494330	A	G	chr1	2562891
1	chr1-2494645	2494645	T	C	chr1	2563206
1	GSA-rs375244639	2495651	A	G	chr1	2564212
1	rs10797432	2501338	T	C	chr1	2569899
1	rs10910092	2501516	A	G	chr1	2570077
1	rs6667605	2502780	T	C	chr1	2571341
1	rs72644674	2512456	T	C	chr1	2581017
1	rs734999	2513216	T	C	chr1	2581777
1	rs111433922	2519975	A	C	chr1	2588536
1	rs115817728	2520428	A	C	chr1	2588989
1	rs6670198	2520527	T	C	chr1	2589088
1	rs2296443	2522392	A	G	chr1	2590953
1	rs141794028	2523015	A	G	chr1	2591576
1	rs138709620	2523053	T	C	chr1	2591614
1	rs144423087	2523412	T	C	chr1	2591973
1	rs141763894	2523418	T	C	chr1	2591979
1	rs116258209	2525386	T	C	chr1	2593947
1	rs3748816	2526746	A	G	chr1	2595307
1	chr1-2527477	2527477	A	C	chr1	2596038
1	GSA-rs34571135	2529283	A	G	chr1	2597844
1	rs112057155	2529552	A	G	chr1	2598113
1	GSA-rs114996135	2534122	T	C	chr1	2602683
1	GSA-rs117981580	2534952	A	C	chr1	2603513
1	rs150660153	2535397	C	G	chr1	2603958
1	rs114540215	2535632	T	C	chr1	2604193
1	rs146150239	2537700	T	C	chr1	2606261
1	GSA-rs78808250	2545088	T	C	chr1	2613649
1	GSA-rs115594597	2546808	T	C	chr1	2615369
1	rs11590198	2551900	A	G	chr1	2620461
1	GSA-rs72646021	2563967	T	C	chr1	2632528
1	GSA-rs55649610	2565327	T	G	chr1	2633888
1	rs4648662	2573199	A	G	chr1	2641760
1	GSA-rs117565304	2575533	T	G	chr1	2644094
1	rs113268807	2575872	T	C	chr1	2644433
1	GSA-rs117874566	2576337	T	C	chr1	2644898
1	GSA-rs78791115	2578729	T	C	chr1	2647290
1	GSA-rs147830412	2579560	A	G	chr1	2648121
1	GSA-rs369329657	2581697	T	C	chr1	2650258
1	rs115187098	2583272	T	C	chr1	2651833
1	rs12063186	2700215	A	G	chr1	2783670
1	GSA-rs114858168	2704698	T	C	chr1	2788133
1	GSA-rs77483654	2708340	T	C	chr1	2791775
1	rs4648356	2709164	A	C	chr1	2792599
1	rs2377041	2713327	T	C	chr1	2796762
1	GSA-rs72646048	2723193	T	G	chr1	2806628
1	GSA-rs57917493	2729038	T	C	chr1	2812473
1	GSA-rs60513129	2729251	T	C	chr1	2812686
1	rs56820613	2735418	A	G	chr1	2818853
1	GSA-rs117203272	2737832	T	C	chr1	2821267
1	GSA-rs369739602	2738772	T	C	chr1	2822207
1	GSA-rs6679232	2739972	A	G	chr1	2823407
1	GSA-rs79446611	2742981	A	G	chr1	2826416
1	GSA-rs116344153	2744237	A	G	chr1	2827672
1	GSA-rs116076619	2745338	A	C	chr1	2828773
1	rs4648482	2749921	T	C	chr1	2833356
1	rs7511879	2752265	A	G	chr1	2835700
1	rs10797390	2752693	T	C	chr1	2836128
1	rs4648384	2756621	A	C	chr1	2840056
1	GSA-rs12739189	2757537	T	C	chr1	2840972
1	GSA-rs114996183	2757675	T	C	chr1	2841110
1	GSA-rs115374664	2764761	T	C	chr1	2848196
1	rs897619	2776777	T	C	chr1	2860212
1	GSA-rs114800103	2778059	T	C	chr1	2861494
1	GSA-rs10909992	2778766	T	C	chr1	2862201
1	rs12409348	2779043	T	C	chr1	2862478
1	rs74047608	2779481	T	C	chr1	2862916
1	GSA-rs116265045	2781267	A	G	chr1	2864702
1	GSA-rs118103097	2781390	T	C	chr1	2864825
1	rs897636	2784092	A	G	chr1	2867527
1	GSA-rs115921278	2788661	A	G	chr1	2872096
1	rs10797342	2797856	T	C	chr1	2881291
1	GSA-rs79327914	2800573	T	C	chr1	2884008
1	GSA-rs2925494	2805028	T	C	chr1	2888463
1	exm2268859	2806107	T	G	chr1	2889542
1	GSA-rs115267687	2811402	A	C	chr1	2894837
1	rs2842910	2817421	T	C	chr1	2900856
1	GSA-rs148956934	2817983	A	G	chr1	2901418
1	rs11807311	2818217	A	C	chr1	2901652
1	GSA-rs114432913	2832957	A	G	chr1	2916392
1	rs7340016	2833332	A	G	chr1	2916767
1	rs1563468	2833743	T	C	chr1	2917178
1	rs2842926	2834025	A	G	chr1	2917460
1	rs2606410	2836099	T	C	chr1	2919534
1	rs55855166	2837444	A	G	chr1	2920879
1	rs34512080	2842483	T	C	chr1	2925918
1	rs10797368	2852707	T	C	chr1	2936142
1	GSA-rs16823228	2853759	A	G	chr1	2937194
1	GSA-rs190789114	2860419	T	C	chr1	2943854
1	rs2925499	2860931	T	C	chr1	2944366
1	rs7539511	2862320	T	G	chr1	2945755
1	GSA-rs141625056	2874312	T	C	chr1	2957747
1	rs10909845	2876525	T	C	chr1	2959960
1	GSA-rs114940840	2878541	T	C	chr1	2961976
1	rs2842925	2886356	A	G	chr1	2969791
1	rs12752801	2886466	T	C	chr1	2969901
1	rs72853379	2886903	A	G	chr1	2970338
1	rs12044030	2889577	T	C	chr1	2973013
1	rs56877975	2894910	A	G	chr1	2978346
1	rs35490531	2897876	A	G	chr1	2981312
1	rs6681741	2898960	T	C	chr1	2982396
1	GSA-rs11586705	2899603	T	G	chr1	2983039
1	rs1572657	2902128	T	C	chr1	2985564
1	GSA-rs79598682	2903725	T	C	chr1	2987161
1	GSA-rs12025260	2917377	T	C	chr1	3000813
1	GSA-rs12022429	2919942	A	G	chr1	3003378
1	rs6685625	2927624	T	C	chr1	3011060
1	GSA-rs74780562	2930786	A	G	chr1	3014222
1	GSA-rs191979483	2932678	A	G	chr1	3016114
1	GSA-rs116142632	2935032	T	G	chr1	3018468
1	GSA-rs377760379	2935411	A	G	chr1	3018847
1	rs35209244	2938395	A	G	chr1	3021831
1	GSA-rs35806103	2938569	T	C	chr1	3022005
1	GSA-rs72629486	2938924	T	G	chr1	3022360
1	rs2142569	2944527	A	G	chr1	3027963
1	rs74048148	2954031	A	G	chr1	3037467
1	rs12724379	2958856	A	C	chr1	3042292
1	GSA-rs78383285	2960407	T	C	chr1	3043843
1	rs717795	2970464	T	C	chr1	3053900
1	GSA-rs115843581	2970621	A	G	chr1	3054057
1	GSA-rs76425763	2975328	A	G	chr1	3058764
1	rs59243365	2979184	A	G	chr1	3062620
1	GSA-rs12563622	2980793	T	C	chr1	3064229
1	GSA-rs117992485	2988725	A	G	chr1	3072161
1	GSA-rs2993482	2991808	T	G	chr1	3075244
1	rs2993486	2993638	A	G	chr1	3077074
1	rs2788094	2998022	T	C	chr1	3081458
1	rs2742687	2998632	A	G	chr1	3082068
1	rs6695131	3000924	T	C	chr1	3084360
1	rs11801109	3003532	A	G	chr1	3086968
1	rs926244	3006283	A	G	chr1	3089719
1	rs2817168	3013690	A	G	chr1	3097126
1	GSA-rs7539543	3013870	A	G	chr1	3097306
1	rs2993493	3020246	A	C	chr1	3103682
1	rs1890336	3024265	A	C	chr1	3107701
1	GSA-rs182515910	3024502	A	G	chr1	3107938
1	rs2993501	3025986	A	C	chr1	3109422
1	rs2993503	3028987	A	G	chr1	3112423
1	rs2072733	3029081	T	C	chr1	3112517
1	GSA-rs115737143	3030907	T	C	chr1	3114343
1	GSA-rs77093975	3036320	T	C	chr1	3119756
1	GSA-rs77009640	3041632	A	C	chr1	3125068
1	GSA-1:3043138	3043138	A	G	chr1	3126574
1	rs79143856	3045623	T	G	chr1	3129059
1	rs2817178	3047252	T	C	chr1	3130688
1	rs10797378	3047447	T	C	chr1	3130883
1	rs2742668	3047612	A	G	chr1	3131048
1	rs10909882	3049713	A	G	chr1	3133149
1	GSA-rs182262540	3052190	T	C	chr1	3135626
1	GSA-rs35877876	3054489	T	C	chr1	3137925
1	rs2742665	3058238	A	C	chr1	3141674
1	GSA-rs115692019	3058662	A	G	chr1	3142098
1	GSA-rs2651909	3061655	A	G	chr1	3145091
1	rs2817187	3062875	T	G	chr1	3146311
1	rs79155405	3062909	T	C	chr1	3146345
1	GSA-rs731031	3072692	T	C	chr1	3156128
1	GSA-rs16823409	3072956	T	C	chr1	3156392
1	rs2651902	3074306	T	C	chr1	3157742
1	GSA-rs79063099	3078729	A	G	chr1	3162165
1	GSA-rs79135020	3080498	T	C	chr1	3163934
1	rs2651899	3083712	T	C	chr1	3167148
1	rs2651935	3086496	T	C	chr1	3169932
1	rs34503920	3089202	T	C	chr1	3172638
1	GSA-rs71634325	3089550	T	C	chr1	3172986
1	GSA-rs114054273	3090354	A	G	chr1	3173790
1	rs61759167	3091587	T	C	chr1	3175023
1	GSA-rs78113663	3093944	A	G	chr1	3177380
1	rs61759178	3098489	T	C	chr1	3181925
1	GSA-rs72846849	3099635	T	C	chr1	3183071
1	rs2651927	3101762	A	C	chr1	3185198
1	rs368409902	3102675	A	G	chr1	3186111
1	GSA-rs78466523	3103786	A	C	chr1	3187222
1	rs10752733	3104630	A	G	chr1	3188066
1	GSA-rs116525159	3104972	A	G	chr1	3188408
1	GSA-rs114482973	3108444	A	G	chr1	3191880
1	rs67620903	3111119	A	C	chr1	3194555
1	exm2260168	3111669	A	G	chr1	3195105
1	rs10909892	3112278	A	G	chr1	3195714
1	rs9659513	3116361	T	G	chr1	3199797
1	rs72846890	3116817	A	G	chr1	3200253
1	GSA-rs55994066	3118301	T	G	chr1	3201737
1	GSA-rs12096975	3118316	A	G	chr1	3201752
1	rs58819932	3119118	A	G	chr1	3202554
1	rs7521730	3120130	T	C	chr1	3203566
1	GSA-rs7521987	3124080	A	G	chr1	3207516
1	GSA-rs13328662	3124155	A	G	chr1	3207591
1	rs4376672	3126090	A	G	chr1	3209526
1	GSA-rs3753758	3127538	A	G	chr1	3210974
1	GSA-rs12403684	3136733	A	G	chr1	3220169
1	rs2651895	3138111	T	G	chr1	3221547
1	rs16823548	3140812	A	G	chr1	3224248
1	rs10158583	3144068	A	G	chr1	3227504
1	rs16823558	3144826	A	G	chr1	3228262
1	rs2651920	3148153	T	C	chr1	3231589
1	rs2455116	3148574	A	G	chr1	3232010
1	rs16823576	3148697	T	C	chr1	3232133
1	GSA-rs115462968	3151810	A	G	chr1	3235246
1	rs11807062	3153237	A	C	chr1	3236673
1	GSA-rs72632108	3158951	T	C	chr1	3242387
1	GSA-rs74048400	3160051	A	C	chr1	3243487
1	rs2500252	3161353	T	C	chr1	3244789
1	rs2937390	3163997	A	G	chr1	3247433
1	GSA-rs11589327	3168174	T	C	chr1	3251610
1	rs72632125	3178716	T	C	chr1	3262152
1	rs2455107	3180158	T	G	chr1	3263594
1	rs16823763	3194916	A	G	chr1	3278352
1	rs61759190	3199121	A	G	chr1	3282557
1	rs111756326	3203275	A	G	chr1	3286711
1	rs55866132	3207780	A	G	chr1	3291216
1	GSA-rs12757342	3208830	T	G	chr1	3292266
1	rs4648468	3210950	A	G	chr1	3294386
1	rs4648377	3211458	A	C	chr1	3294894
1	GSA-rs116356993	3212881	T	C	chr1	3296317
1	rs2455144	3214732	A	G	chr1	3298168
1	rs2455137	3217151	T	C	chr1	3300587
1	rs2455135	3219901	A	G	chr1	3303337
1	GSA-rs115783718	3221580	A	G	chr1	3305016
1	GSA-rs114496206	3227975	A	G	chr1	3311411
1	GSA-rs79695255	3229477	T	C	chr1	3312913
1	rs6687835	3237174	T	C	chr1	3320610
1	rs57675406	3241116	A	G	chr1	3324552
1	rs10909930	3243017	T	G	chr1	3326453
1	GSA-rs115643284	3247143	A	G	chr1	3330579
1	GSA-rs2483274	3248098	A	G	chr1	3331534
1	rs2483275	3249242	T	C	chr1	3332678
1	rs2483278	3252104	T	C	chr1	3335540
1	rs2483280	3255539	A	G	chr1	3338975
1	rs6686156	3259029	T	C	chr1	3342465
1	rs4648379	3261516	T	C	chr1	3344952
1	rs4415513	3261682	T	C	chr1	3345118
1	GSA-rs12076855	3269710	A	C	chr1	3353146
1	rs35864930	3271154	T	G	chr1	3354590
1	rs7550526	3272541	A	G	chr1	3355977
1	rs946760	3272755	A	G	chr1	3356191
1	GSA-1:3277176	3277176	T	G	chr1	3360612
1	rs11807862	3279268	T	A	chr1	3362704
1	rs7524171	3279324	A	G	chr1	3362760
1	GSA-rs78930433	3279388	T	C	chr1	3362824
1	rs6658356	3280253	A	G	chr1	3363689
1	rs4648487	3285304	T	C	chr1	3368740
1	GSA-rs114079022	3287263	A	C	chr1	3370699
1	rs4648489	3293665	A	G	chr1	3377101
1	seq-rs2493309	3296951	T	C	chr1	3380387
1	rs868688	3300807	T	C	chr1	3384243
1	GSA-rs117381898	3301586	A	G	chr1	3385022
1	GSA-rs181709168	3301657	A	G	chr1	3385093
1	GSA-rs2245703	3303446	T	C	chr1	3386882
1	GSA-rs6666433	3303633	A	G	chr1	3387069
1	rs2493278	3307746	T	C	chr1	3391182
1	GSA-rs2493268	3308498	T	C	chr1	3391934
1	rs7535965	3313282	A	G	chr1	3396718
1	rs11577526	3318435	A	G	chr1	3401871
1	rs185041492	3319384	A	G	chr1	3402820
1	rs188908415	3328187	T	C	chr1	3411623
1	rs2493292	3328659	T	C	chr1	3412095
1	rs149333409	3329051	A	G	chr1	3412487
1	GSA-rs72851311	3330390	T	C	chr1	3413826
1	GSA-rs11578951	3330747	A	G	chr1	3414183
1	rs184929979	3331138	A	G	chr1	3414574
1	rs2493285	3333595	A	G	chr1	3417031
1	GSA-rs147328263	3333910	T	C	chr1	3417346
1	rs2493284	3337156	A	G	chr1	3420592
1	rs11579873	3337636	A	G	chr1	3421072
1	rs4648385	3340269	T	C	chr1	3423705
1	rs2244013	3342530	A	G	chr1	3425966
1	rs187400273	3342635	T	C	chr1	3426071
1	rs2493280	3343356	T	G	chr1	3426792
1	GSA-rs2483239	3344215	A	G	chr1	3427651
1	rs201654872	3347452	A	G	chr1	3430888
1	rs2493272	3349513	T	C	chr1	3432949
1	chr1-3350297	3350297	A	G	chr1	3433733
1	GSA-rs79456262	3360343	T	G	chr1	3443779
1	GSA-rs118191730	3360366	A	G	chr1	3443802
1	rs867814	3362256	T	C	chr1	3445692
1	GSA-rs11808779	3364487	T	C	chr1	3447923
1	rs12086322	3366314	A	G	chr1	3449750
1	rs3806164	3380057	A	G	chr1	3463493
1	GSA-rs190205464	3388130	A	G	chr1	3471566
1	chr1-3388303	3388303	T	C	chr1	3471739
1	rs41315284	3389757	A	G	chr1	3473193
1	GSA-rs56309807	3397062	A	G	chr1	3480498
1	rs11579276	3398984	T	C	chr1	3482420
1	rs115919274	3404818	A	G	chr1	3488254
1	GSA-rs61910697	3410410	T	C	chr1	3493846
1	GSA-rs12075570	3410973	T	C	chr1	3494409
1	GSA-rs56175625	3412254	A	G	chr1	3495690
1	chr1-3414174	3414174	A	C	chr1	3497610
1	GSA-rs61742846	3417211	A	G	chr1	3500647
1	chr1-3417218	3417218	T	C	chr1	3500654
1	GSA-rs149336788	3417645	T	G	chr1	3501081
1	chr1-3422007	3422007	A	G	chr1	3505443
1	rs947344	3423467	T	C	chr1	3506903
1	GSA-rs947345	3424388	A	G	chr1	3507824
1	chr1-3424419	3424419	T	C	chr1	3507855
1	rs11587498	3432993	A	G	chr1	3516429
1	GSA-rs78046265	3438505	A	G	chr1	3521941
1	rs41307039	3440753	A	G	chr1	3524189
1	rs10797399	3440824	A	G	chr1	3524260
1	GSA-rs115852179	3441702	T	C	chr1	3525138
1	GSA-rs114476348	3443288	T	C	chr1	3526724
1	GSA-rs58486343	3444994	A	G	chr1	3528430
1	rs12119711	3451005	T	C	chr1	3534441
1	GSA-1:3452549	3452549	A	G	chr1	3535985
1	GSA-rs12562983	3457311	T	C	chr1	3540747
1	GSA-rs34673906	3457419	A	G	chr1	3540855
1	GSA-rs113595493	3460730	T	C	chr1	3544166
1	GSA-rs10797401	3462904	T	C	chr1	3546340
1	rs6685801	3464451	T	C	chr1	3547887
1	GSA-rs72853563	3466895	T	C	chr1	3550331
1	GSA-rs72853567	3469948	A	G	chr1	3553384
1	GSA-rs12078542	3470381	T	C	chr1	3553817
1	GSA-rs140350167	3472695	T	C	chr1	3556131
1	GSA-rs7520098	3472952	T	C	chr1	3556388
1	GSA-rs12129430	3478487	A	G	chr1	3561923
1	rs7525042	3479335	T	G	chr1	3562771
1	GSA-rs77039417	3480162	T	C	chr1	3563598
1	rs75995598	3485108	T	C	chr1	3568544
1	rs867413	3486335	A	G	chr1	3569771
1	GSA-rs883106	3486471	A	G	chr1	3569907
1	rs947354	3487126	T	C	chr1	3570562
1	GSA-rs79568147	3487304	A	G	chr1	3570740
1	GSA-rs10909973	3495672	A	G	chr1	3579108
1	GSA-rs114165793	3498535	A	C	chr1	3581971
1	rs10909974	3499067	T	C	chr1	3582503
1	GSA-rs115264380	3500750	T	C	chr1	3584186
1	rs4648527	3507861	A	G	chr1	3591297
1	GSA-rs80280964	3509817	T	C	chr1	3593253
1	GSA-rs74469838	3511431	T	C	chr1	3594867
1	rs7513275	3511934	A	G	chr1	3595370
1	GSA-rs115292644	3512115	A	G	chr1	3595551
1	rs56770023	3518487	T	C	chr1	3601923
1	GSA-rs116611577	3522794	A	G	chr1	3606230
1	GSA-rs78267041	3528586	T	C	chr1	3612022
1	rs7522507	3534808	A	G	chr1	3618244
1	GSA-rs115139039	3539460	T	C	chr1	3622896
1	GSA-rs76777395	3541356	A	G	chr1	3624792
1	chr1-3547564	3547564	T	C	chr1	3631000
1	chr1-3547990	3547990	A	G	chr1	3631426
1	GSA-rs115919043	3549366	A	G	chr1	3632802
1	GSA-rs77144466	3552607	A	G	chr1	3636043
1	GSA-rs3765689	3559482	A	G	chr1	3642918
1	rs6697769	3570883	T	C	chr1	3654319
1	rs2181484	3572774	A	G	chr1	3656210
1	rs2368544	3574756	T	C	chr1	3658192
1	rs10910004	3576197	T	C	chr1	3659633
1	rs4648545	3577321	A	G	chr1	3660757
1	rs3765692	3584771	T	C	chr1	3668207
1	rs3765695	3587377	A	C	chr1	3670813
1	GSA-rs56255778	3589971	A	C	chr1	3673407
1	rs6671482	3590425	A	G	chr1	3673861
1	rs3765703	3592436	T	G	chr1	3675872
1	GSA-rs10910007	3592483	T	C	chr1	3675919
1	GSA-rs5031052	3598899	T	C	chr1	3682335
1	rs57596460	3599514	T	C	chr1	3682950
1	GSA-rs114522823	3603650	T	C	chr1	3687086
1	rs78030280	3604189	A	G	chr1	3687625
1	GSA-rs78360892	3606481	T	C	chr1	3689917
1	GSA-rs3819957	3607606	A	C	chr1	3691042
1	rs3765731	3611892	A	G	chr1	3695328
1	rs3819958	3613067	A	G	chr1	3696503
1	rs1077603	3613218	T	C	chr1	3696654
1	rs3765736	3616601	T	C	chr1	3700037
1	GSA-rs115694533	3622073	A	G	chr1	3705509
1	GSA-rs55657548	3623621	T	C	chr1	3707057
1	rs145204413	3624206	A	C	chr1	3707642
1	rs3765754	3625548	T	C	chr1	3708984
1	GSA-rs6688320	3630630	T	G	chr1	3714066
1	rs3753211	3632608	T	C	chr1	3716044
1	GSA-rs3765769	3635630	T	C	chr1	3719066
1	rs2181487	3637812	A	C	chr1	3721248
1	rs200330726	3645901	A	G	chr1	3729337
1	GSA-rs6695978	3648345	A	G	chr1	3731781
1	GSA-rs12562437	3651031	T	C	chr1	3734467
1	GSA-rs76059087	3657308	A	G	chr1	3740744
1	rs12117836	3657759	A	G	chr1	3741195
1	rs76597070	3669356	A	G	chr1	3752792
1	chr1-3672032	3672032	T	G	chr1	3755468
1	chr1-3673409	3673409	A	C	chr1	3756845
1	rs1181883	3677933	T	C	chr1	3761369
1	GSA-rs78231122	3678128	A	G	chr1	3761564
1	GSA-rs1181880	3678904	T	C	chr1	3762340
1	GSA-rs76416341	3679783	T	C	chr1	3763219
1	chr1-3680320	3680320	T	C	chr1	3763756
1	rs144028564	3680345	T	C	chr1	3763781
1	chr1-3680362	3680362	T	C	chr1	3763798
1	chr1-3680401	3680401	A	G	chr1	3763837
1	GSA-rs41306998	3680427	T	C	chr1	3763863
1	rs144089943	3683159	A	C	chr1	3766595
1	GSA-rs2275837	3686318	A	G	chr1	3769754
1	chr1-3688073	3688073	A	G	chr1	3771509
1	GSA-1:3688959	3688959	T	C	chr1	3772395
1	JHU_1.3691400	3691401	T	C	chr1	3774837
1	rs1175550	3691528	A	G	chr1	3774964
1	rs1175549	3691727	A	C	chr1	3775163
1	1:3691941-CT	3691941	T	C	chr1	3775377
1	GSA-rs112642923	3693591	A	C	chr1	3777027
1	GSA-rs77799767	3694362	T	C	chr1	3777798
1	GSA-rs11547616	3696925	T	C	chr1	3780361
1	rs11547615	3697663	T	C	chr1	3781099
1	chr1-3698166	3698166	T	C	chr1	3781602
1	chr1-3700639	3700639	A	C	chr1	3784075
1	rs2253143	3703710	A	G	chr1	3787146
1	rs60946587	3705888	A	G	chr1	3789324
1	rs6662706	3732596	T	G	chr1	3816032
1	GSA-rs34692790	3736850	T	G	chr1	3820286
1	rs9286792	3737036	A	G	chr1	3820472
1	GSA-rs77454585	3738018	T	C	chr1	3821454
1	rs148840465	3739745	T	C	chr1	3823181
1	GSA-rs12759497	3742257	T	C	chr1	3825693
1	rs6688969	3743391	T	C	chr1	3826827
1	rs139181137	3745870	T	C	chr1	3829306
1	rs61768915	3749115	T	C	chr1	3832551
1	rs2368533	3750167	A	G	chr1	3833603
1	chr1-3751623	3751623	A	G	chr1	3835059
1	rs138897239	3751634	A	G	chr1	3835070
1	chr1-3753063	3753063	T	G	chr1	3836499
1	GSA-rs115115143	3753712	A	C	chr1	3837148
1	chr1-3753972	3753972	A	G	chr1	3837408
1	GSA-rs10797347	3759784	A	G	chr1	3843220
1	GSA-rs77163906	3763768	A	G	chr1	3847204
1	rs76925798	3764049	A	G	chr1	3847485
1	GSA-rs78110949	3769760	A	G	chr1	3853196
1	rs10909810	3783278	A	C	chr1	3866714
1	GSA-rs75683196	3783880	T	C	chr1	3867316
1	GSA-rs72848464	3784276	A	G	chr1	3867712
1	chr1-3784549	3784549	T	C	chr1	3867985
1	GSA-rs78142113	3785538	A	C	chr1	3868974
1	rs5013486	3786612	T	C	chr1	3870048
1	chr1-3789034	3789034	A	G	chr1	3872470
1	rs34108662	3790332	T	C	chr1	3873768
1	rs36081432	3792310	T	C	chr1	3875746
1	rs12564400	3800118	A	G	chr1	3883554
1	rs3205087	3800242	A	G	chr1	3883678
1	rs9786975	3802900	A	G	chr1	3886336
1	rs7367066	3803755	T	C	chr1	3887191
1	rs7530189	3805098	T	C	chr1	3888534
1	chr1-3806595	3806595	A	G	chr1	3890031
1	chr1-3807332	3807332	A	G	chr1	3890768
1	seq-rs143229412	3807344	G	C	chr1	3890780
1	seq-rs143229412.1	3807344	T	C	chr1	3890780
1	rs140955464	3807507	A	C	chr1	3890943
1	chr1-3807537	3807537	A	G	chr1	3890973
1	GSA-rs35157037	3809528	T	C	chr1	3892964
1	GSA-rs45555931	3811848	T	C	chr1	3895284
1	GSA-rs117780450	3819170	A	G	chr1	3902606
1	rs34684424	3823395	T	C	chr1	3906831
1	GSA-rs77084525	3823431	T	C	chr1	3906867
1	rs76419011	3823804	T	C	chr1	3907240
1	GSA-rs78783957	3824656	T	C	chr1	3908092
1	GSA-rs35383955	3825525	T	C	chr1	3908961
1	GSA-rs74559159	3835304	A	G	chr1	3918740
1	rs80294302	3835967	A	G	chr1	3919403
1	rs36109325	3838400	T	C	chr1	3921836
1	rs35025175	3840449	T	C	chr1	3923885
1	rs35974482	3840878	A	G	chr1	3924314
1	GSA-rs80309618	3995644	T	C	chr1	3935585
1	rs61770398	3995906	T	C	chr1	3935847
1	rs10157948	4000091	T	C	chr1	3940031
1	GSA-rs12405638	4000610	A	G	chr1	3940550
1	rs28438555	4002600	T	C	chr1	3942540
1	rs116047005	4003296	T	C	chr1	3943236
1	rs72640993	4004028	T	C	chr1	3943968
1	GSA-rs116446811	4005256	A	G	chr1	3945196
1	rs57415555	4005540	T	C	chr1	3945480
1	rs7524279	4005693	A	G	chr1	3945633
1	GSA-rs72642208	4006432	T	C	chr1	3946372
1	GSA-rs115343855	4008061	T	G	chr1	3948001
1	rs10799181	4009071	T	C	chr1	3949011
1	GSA-rs6682838	4009750	A	G	chr1	3949690
1	rs4654481	4009855	T	C	chr1	3949795
1	GSA-rs74050439	4012010	A	G	chr1	3951950
1	rs10753366	4013602	A	C	chr1	3953542
1	rs7522140	4017137	T	C	chr1	3957077
1	rs7550609	4026098	T	C	chr1	3966038
1	GSA-rs12756428	4027455	A	G	chr1	3967395
1	GSA-rs57147548	4032762	T	C	chr1	3972702
1	GSA-rs12031557	4034097	A	G	chr1	3974037
1	rs12028397	4037665	T	C	chr1	3977605
1	GSA-rs192947883	4045222	T	C	chr1	3985162
1	GSA-rs150691159	4053681	T	C	chr1	3993621
1	rs9426500	4054972	A	C	chr1	3994912
1	rs12135298	4057488	A	G	chr1	3997428
1	rs4654557	4058444	T	C	chr1	3998384
1	rs10915565	4060196	T	C	chr1	4000136
1	rs4128222	4066781	A	C	chr1	4006721
1	rs68085961	4066956	A	G	chr1	4006896
1	rs6675979	4068052	A	G	chr1	4007992
1	GSA-rs55866108	4068246	A	G	chr1	4008186
1	rs72852529	4076373	A	G	chr1	4016313
1	rs4129100	4078448	A	G	chr1	4018388
1	GSA-rs74812776	4079944	T	C	chr1	4019884
1	rs3813810	4088339	A	C	chr1	4028279
1	GSA-rs10915659	4092949	A	G	chr1	4032889
1	GSA-rs60561351	4094092	A	G	chr1	4034032
1	rs12036953	4104757	A	G	chr1	4044697
1	GSA-rs5018350	4105421	A	C	chr1	4045361
1	GSA-rs10915323	4106987	A	G	chr1	4046927
1	rs75864646	4107166	T	C	chr1	4047106
1	GSA-rs115563135	4107238	T	C	chr1	4047178
1	rs12031502	4108761	T	G	chr1	4048701
1	rs60034634	4109399	A	G	chr1	4049339
1	rs58967398	4110784	T	C	chr1	4050724
1	rs12749761	4111187	A	G	chr1	4051127
1	rs10799171	4115576	T	C	chr1	4055516
1	rs4233258	4120898	T	C	chr1	4060838
1	rs7524800	4121584	A	G	chr1	4061524
1	rs4654408	4127861	T	C	chr1	4067801
1	rs16840701	4129266	A	C	chr1	4069206
1	GSA-rs139457605	4131414	A	G	chr1	4071354
1	GSA-rs140439012	4132250	T	C	chr1	4072190
1	GSA-rs78227912	4133242	A	C	chr1	4073182
1	rs4639725	4139931	T	C	chr1	4079871
1	rs10915421	4145615	T	C	chr1	4085555
1	rs10915422	4145875	A	C	chr1	4085815
1	GSA-rs12065003	4150785	T	C	chr1	4090725
1	rs115530964	4151121	A	G	chr1	4091061
1	rs4548406	4151751	T	C	chr1	4091691
1	rs10915428	4158955	T	G	chr1	4098895
1	rs77591952	4162563	A	G	chr1	4102503
1	rs12073797	4165198	A	G	chr1	4105138
1	GSA-rs74049021	4166023	A	C	chr1	4105963
1	GSA-rs78714318	4168697	T	G	chr1	4108637
1	rs12077262	4170048	T	C	chr1	4109988
1	rs10492944	4171786	T	C	chr1	4111726
1	GSA-rs16840790	4173506	T	C	chr1	4113446
1	GSA-rs72629594	4175867	T	C	chr1	4115807
1	GSA-rs78557694	4177742	A	G	chr1	4117682
1	GSA-rs76524407	4178632	T	C	chr1	4118572
1	rs12566219	4180839	A	G	chr1	4120779
1	GSA-rs12040805	4180842	T	C	chr1	4120782
1	rs10915437	4183006	A	G	chr1	4122946
1	rs114008086	4189226	T	C	chr1	4129166
1	GSA-rs55916310	4190167	A	G	chr1	4130107
1	rs74410087	4192397	A	G	chr1	4132337
1	rs12568266	4193551	A	G	chr1	4133491
1	rs4131507	4194712	T	C	chr1	4134652
1	GSA-rs6702633	4197035	A	G	chr1	4136975
1	rs57352098	4199172	A	G	chr1	4139112
1	GSA-rs16840831	4200169	A	G	chr1	4140109
1	GSA-rs75359796	4200489	A	G	chr1	4140429
1	rs4654492	4201815	T	C	chr1	4141755
1	rs6683453	4210402	A	G	chr1	4150342
1	rs16840866	4212493	A	G	chr1	4152433
1	GSA-rs142704110	4213869	T	C	chr1	4153809
1	rs72851488	4218044	T	C	chr1	4157984
1	GSA-rs117519891	4218592	A	C	chr1	4158532
1	rs75151855	4219747	A	G	chr1	4159687
1	rs78314286	4224315	T	C	chr1	4164255
1	rs78485316	4225087	T	C	chr1	4165027
1	GSA-rs79328779	4227091	T	C	chr1	4167031
1	rs12123330	4227464	T	C	chr1	4167404
1	rs4468133	4227634	A	G	chr1	4167574
1	GSA-rs75291763	4231558	T	C	chr1	4171498
1	rs6688343	4231757	T	C	chr1	4171697
1	rs12032295	4231964	T	C	chr1	4171904
1	rs6694801	4233380	T	C	chr1	4173320
1	rs6690519	4234513	T	C	chr1	4174453
1	rs4233264	4240178	T	C	chr1	4180118
1	rs11808641	4250933	A	G	chr1	4190873
1	GSA-rs113485362	4262453	A	C	chr1	4202393
1	rs4654510	4263063	T	G	chr1	4203003
1	rs6687268	4263677	T	C	chr1	4203617
1	GSA-rs12022636	4271526	A	C	chr1	4211466
1	rs10915479	4277948	T	C	chr1	4217888
1	rs11579829	4282786	T	C	chr1	4222726
1	GSA-rs112629950	4287392	A	G	chr1	4227332
1	rs10799218	4289899	T	C	chr1	4229839
1	rs10158644	4292799	A	G	chr1	4232739
1	GSA-rs72631044	4298036	A	G	chr1	4237976
1	GSA-rs11580697	4300158	T	C	chr1	4240098
1	GSA-rs115608881	4311009	T	G	chr1	4250949
1	GSA-rs16841032	4314360	T	C	chr1	4254300
1	rs966321	4315204	T	G	chr1	4255144
1	GSA-rs964716	4316688	A	G	chr1	4256628
1	rs10915494	4328476	T	C	chr1	4268416
1	rs903541	4335893	A	G	chr1	4275833
1	rs75263049	4338586	A	G	chr1	4278526
1	rs1390136	4341843	T	C	chr1	4281783
1	GSA-rs141596635	4351414	A	G	chr1	4291354
1	rs16838560	4351888	T	C	chr1	4291828
1	rs16838566	4358265	A	G	chr1	4298205
1	GSA-rs115293227	4358906	T	C	chr1	4298846
1	GSA-rs61769413	4359236	A	G	chr1	4299176
1	rs34546429	4360348	A	G	chr1	4300288
1	rs200326227	4363034	A	G	chr1	4302974
1	rs74049161	4363625	T	C	chr1	4303565
1	rs34429154	4363735	A	C	chr1	4303675
1	rs693734	4364226	T	C	chr1	4304166
1	rs351625	4365471	T	G	chr1	4305411
1	rs1490413	4367323	A	G	chr1	4307263
1	rs16838616	4368304	A	C	chr1	4308244
1	rs351619	4368819	A	G	chr1	4308759
1	rs351615	4370385	A	G	chr1	4310325
1	rs12073612	4370489	A	G	chr1	4310429
1	GSA-rs1495238	4370588	A	C	chr1	4310528
1	rs12132314	4371949	T	C	chr1	4311889
1	rs10915509	4375859	A	C	chr1	4315799
1	GSA-rs12408012	4379687	A	G	chr1	4319627
1	rs351606	4384056	T	C	chr1	4323996
1	rs2411740	4388684	T	C	chr1	4328624
1	rs641473	4388885	T	C	chr1	4328825
1	rs111555716	4396839	T	C	chr1	4336779
1	GSA-rs187000844	4404411	A	G	chr1	4344351
1	GSA-rs17409380	4405102	T	G	chr1	4345042
1	rs10799228	4405998	A	G	chr1	4345938
1	GSA-rs114295570	4411626	T	G	chr1	4351566
1	GSA-rs72631080	4414668	T	C	chr1	4354608
1	GSA-rs79461685	4418667	A	G	chr1	4358607
1	GSA-rs116821470	4419975	A	G	chr1	4359915
1	rs17410050	4419997	T	C	chr1	4359937
1	rs75411	4425414	T	C	chr1	4365354
1	GSA-rs572439	4431264	A	C	chr1	4371204
1	rs12028738	4431571	A	G	chr1	4371511
1	GSA-rs67295876	4432852	A	G	chr1	4372792
1	rs239339	4444539	T	G	chr1	4384479
1	GSA-rs72632742	4452838	A	C	chr1	4392778
1	GSA-rs115174136	4455887	A	C	chr1	4395827
1	GSA-rs7521665	4456277	A	G	chr1	4396217
1	GSA-rs4654530	4457859	T	C	chr1	4397799
1	GSA-rs349400	4462460	T	G	chr1	4402400
1	GSA-rs114342062	4477412	T	C	chr1	4417352
1	rs4654432	4481215	T	C	chr1	4421155
1	GSA-rs79062302	4486932	A	G	chr1	4426872
1	rs12029910	4488779	A	G	chr1	4428719
1	rs6658372	4488979	A	G	chr1	4428919
1	GSA-rs6678792	4489398	T	C	chr1	4429338
1	GSA-rs1762814	4496256	T	C	chr1	4436196
1	rs77633111	4497313	A	G	chr1	4437253
1	rs12731060	4500436	T	C	chr1	4440376
1	rs780588	4506325	T	G	chr1	4446265
1	rs780593	4507743	T	C	chr1	4447683
1	rs11584026	4514453	A	G	chr1	4454393
1	rs12691489	4516259	A	G	chr1	4456199
1	rs666152	4518202	T	G	chr1	4458142
1	rs72633529	4523324	A	G	chr1	4463264
1	rs6426414	4527772	A	G	chr1	4467712
1	rs12143782	4534350	T	C	chr1	4474290
1	GSA-rs55653177	4534969	T	C	chr1	4474909
1	exm2260335	4541390	A	C	chr1	4481330
1	rs114240781	4542308	T	C	chr1	4482248
1	rs6656245	4543663	A	G	chr1	4483603
1	rs16839098	4544815	T	C	chr1	4484755
1	rs350182	4548292	A	G	chr1	4488232
1	rs705689	4549307	T	G	chr1	4489247
1	rs705690	4549380	A	G	chr1	4489320
1	rs116532395	4552482	A	C	chr1	4492422
1	GSA-rs75456065	4556256	A	G	chr1	4496196
1	rs582598	4561962	A	C	chr1	4501902
1	GSA-rs34567044	4566418	A	G	chr1	4506358
1	rs4654441	4566515	A	G	chr1	4506455
1	GSA-rs150200468	4568131	A	G	chr1	4508071
1	rs780568	4569834	A	G	chr1	4509774
1	rs79383560	4574090	A	G	chr1	4514030
1	GSA-rs1710422	4574117	T	C	chr1	4514057
1	rs6703696	4578495	A	G	chr1	4518435
1	GSA-rs116415025	4579234	A	G	chr1	4519174
1	rs12035830	4579733	A	G	chr1	4519673
1	GSA-rs55989806	4583448	A	C	chr1	4523388
1	rs241240	4586306	T	G	chr1	4526246
1	GSA-rs241232	4590969	A	G	chr1	4530909
1	rs537398	4594603	T	C	chr1	4534543
1	rs12080165	4596700	T	G	chr1	4536640
1	rs74773514	4602986	A	G	chr1	4542926
1	rs7534050	4603127	T	C	chr1	4543067
1	GSA-rs114427637	4605457	T	C	chr1	4545397
1	rs112721082	4606115	T	G	chr1	4546055
1	GSA-rs75575768	4613047	T	C	chr1	4552987
1	rs241257	4614822	T	C	chr1	4554762
1	rs4654556	4615331	T	C	chr1	4555271
1	rs72852789	4615934	T	G	chr1	4555874
1	rs12120353	4620996	A	C	chr1	4560936
1	GSA-rs144148788	4621193	T	G	chr1	4561133
1	GSA-rs184359379	4623910	A	G	chr1	4563850
1	rs241278	4629408	T	C	chr1	4569348
1	rs80308628	4631310	A	G	chr1	4571250
1	rs171317	4632828	A	C	chr1	4572768
1	rs7534062	4633238	T	C	chr1	4573178
1	rs12075731	4633404	A	C	chr1	4573344
1	rs6426421	4633639	T	C	chr1	4573579
1	GSA-rs12741243	4636675	A	G	chr1	4576615
1	GSA-rs1157688	4636767	T	C	chr1	4576707
1	rs1024139	4640902	T	C	chr1	4580842
1	GSA-rs113995267	4641668	A	G	chr1	4581608
1	rs725563	4643472	T	G	chr1	4583412
1	rs616180	4645704	T	G	chr1	4585644
1	GSA-rs619364	4646379	A	G	chr1	4586319
1	rs1849943	4649316	A	G	chr1	4589256
1	rs164772	4652512	T	C	chr1	4592452
1	rs6426423	4656147	A	C	chr1	4596087
1	GSA-rs117638862	4660434	A	C	chr1	4600374
1	rs537761	4662408	A	C	chr1	4602348
1	rs164783	4664614	A	C	chr1	4604554
1	rs3896439	4668670	A	G	chr1	4608610
1	rs10915571	4674429	T	C	chr1	4614369
1	rs4654569	4675555	A	G	chr1	4615495
1	GSA-rs4654574	4679731	T	C	chr1	4619671
1	GSA-rs77849464	4680353	T	C	chr1	4620293
1	GSA-rs114777976	4682438	A	G	chr1	4622378
1	rs12029673	4684090	A	G	chr1	4624030
1	GSA-rs1107468	4684846	A	G	chr1	4624786
1	rs875807	4685672	A	G	chr1	4625612
1	GSA-rs75639810	4685906	T	C	chr1	4625846
1	GSA-rs77064382	4690808	T	C	chr1	4630748
1	rs7527078	4690893	T	C	chr1	4630833
1	rs10799249	4691860	T	C	chr1	4631800
1	GSA-rs75035073	4696084	A	G	chr1	4636024
1	GSA-rs79001594	4696853	T	C	chr1	4636793
1	rs12122754	4698559	T	C	chr1	4638499
1	rs76059212	4698677	A	G	chr1	4638617
1	GSA-rs10915575	4701258	T	C	chr1	4641198
1	rs61764994	4702296	A	G	chr1	4642236
1	rs74727341	4704223	A	C	chr1	4644163
1	rs12125737	4706755	T	C	chr1	4646695
1	rs900501	4717340	T	C	chr1	4657280
1	rs2035454	4722431	A	G	chr1	4662371
1	rs12408160	4723046	T	C	chr1	4662986
1	rs12083131	4723818	A	G	chr1	4663758
1	GSA-rs78173795	4724250	T	C	chr1	4664190
1	rs2035455	4724632	T	C	chr1	4664572
1	rs17421247	4724957	T	C	chr1	4664897
1	rs11588149	4725496	T	C	chr1	4665436
1	rs7517857	4725585	A	G	chr1	4665525
1	GSA-rs12567266	4726454	T	C	chr1	4666394
1	GSA-rs376142033	4729781	T	C	chr1	4669721
1	rs4281299	4730960	T	C	chr1	4670900
1	rs4654585	4733239	T	C	chr1	4673179
1	GSA-rs78598397	4736340	A	G	chr1	4676280
1	GSA-rs72637574	4737405	T	C	chr1	4677345
1	rs16839450	4737531	T	C	chr1	4677471
1	rs115426150	4737666	A	G	chr1	4677606
1	rs2071990	4738058	T	C	chr1	4677998
1	GSA-rs2071995	4738678	T	C	chr1	4678618
1	rs763238	4743704	T	C	chr1	4683644
1	rs12402150	4750267	A	C	chr1	4690207
1	GSA-rs114235078	4750590	A	C	chr1	4690530
1	GSA-rs114983999	4751901	T	C	chr1	4691841
1	rs16839469	4751995	A	G	chr1	4691935
1	rs4654587	4752960	A	G	chr1	4692900
1	GSA-rs17349117	4754651	A	G	chr1	4694591
1	GSA-rs75067031	4755883	T	C	chr1	4695823
1	rs12121882	4758327	T	C	chr1	4698267
1	rs35923204	4766739	T	C	chr1	4706679
1	rs3766961	4779955	A	G	chr1	4719895
1	rs3820251	4781151	T	C	chr1	4721091
1	GSA-rs3820252	4784556	T	C	chr1	4724496
1	rs16839524	4785449	T	C	chr1	4725389
1	rs242044	4787119	A	G	chr1	4727059
1	rs242050	4789179	A	G	chr1	4729119
1	rs3766964	4792184	T	C	chr1	4732124
1	GSA-rs141899425	4796572	T	C	chr1	4736512
1	rs75801608	4799110	A	G	chr1	4739050
1	GSA-rs76770766	4799750	T	G	chr1	4739690
1	rs115486560	4801728	A	G	chr1	4741668
1	rs3753708	4805034	A	C	chr1	4744974
1	GSA-rs409048	4805674	T	C	chr1	4745614
1	rs7532708	4806207	A	G	chr1	4746147
1	GSA-rs115722628	4806370	T	C	chr1	4746310
1	rs2802720	4809120	T	C	chr1	4749060
1	rs72639906	4813360	T	C	chr1	4753300
1	rs11591221	4817508	T	C	chr1	4757448
1	rs523141	4819667	A	G	chr1	4759607
1	GSA-rs3766974	4821049	A	G	chr1	4760989
1	GSA-rs191866694	4821625	T	G	chr1	4761565
1	rs426095	4828063	A	G	chr1	4768003
1	rs9426483	4830900	T	C	chr1	4770840
1	GSA-rs423285	4831076	T	C	chr1	4771016
1	rs12030265	4831752	T	C	chr1	4771692
1	GSA-rs12737329	4832839	T	C	chr1	4772779
1	rs399377	4835375	T	C	chr1	4775315
1	rs3753732	4838249	A	C	chr1	4778189
1	GSA-rs371200826	4842988	T	C	chr1	4782928
1	GSA-rs115280749	4843233	A	G	chr1	4783173
1	rs9426506	4844376	T	C	chr1	4784316
1	rs11805709	4847594	T	C	chr1	4787534
1	GSA-rs78605363	4850150	A	G	chr1	4790090
1	rs7519688	4853910	T	C	chr1	4793850
1	GSA-rs139713043	4857752	A	G	chr1	4797692
1	GSA-rs16839670	4858666	A	C	chr1	4798606
1	rs17345280	4859537	A	C	chr1	4799477
1	GSA-rs78287039	4860555	A	G	chr1	4800495
1	rs4654607	4861160	T	C	chr1	4801100
1	GSA-rs760817	4863913	T	C	chr1	4803853
1	GSA-rs10799262	4872571	A	G	chr1	4812511
1	rs2050010	4880917	A	C	chr1	4820857
1	rs2181699	4888012	T	G	chr1	4827952
1	GSA-rs10799265	4889604	T	C	chr1	4829544
1	GSA-rs61766788	4890255	A	G	chr1	4830195
1	rs10915626	4906783	A	G	chr1	4846723
1	GSA-rs6426440	4914910	A	C	chr1	4854850
1	rs10915645	4928187	T	G	chr1	4868127
1	GSA-rs114242555	4929004	T	C	chr1	4868944
1	GSA-rs7520695	4929561	T	C	chr1	4869501
1	GSA-rs79360823	4930085	T	C	chr1	4870025
1	GSA-rs12044914	4932655	A	C	chr1	4872595
1	rs10489138	4934067	T	C	chr1	4874007
1	GSA-rs141455883	4936983	A	G	chr1	4876923
1	GSA-rs77821625	4937139	A	G	chr1	4877079
1	rs12061881	4946268	T	C	chr1	4886208
1	GSA-rs115117311	4950877	A	G	chr1	4890817
1	rs6664880	4952788	A	G	chr1	4892728
1	GSA-rs12025356	4954746	A	G	chr1	4894686
1	GSA-rs6426446	4955862	T	C	chr1	4895802
1	GSA-rs72634113	4958491	T	C	chr1	4898431
1	GSA-rs115039225	4964674	A	G	chr1	4904614
1	GSA-rs115500860	4965417	T	C	chr1	4905357
1	rs11805753	4973107	T	C	chr1	4913047
1	rs12035499	4980692	A	G	chr1	4920632
1	rs942245	4981503	A	G	chr1	4921443
1	GSA-rs61764931	4986475	A	G	chr1	4926415
1	rs4595344	4986684	T	C	chr1	4926624
1	rs6666453	4987424	T	G	chr1	4927364
1	GSA-rs6658988	4987953	T	C	chr1	4927893
1	rs12567162	4988063	A	C	chr1	4928003
1	rs2898853	4992204	T	C	chr1	4932144
1	rs35357722	4993039	A	G	chr1	4932979
1	GSA-rs9426488	4994367	T	C	chr1	4934307
1	rs10915683	4996185	A	G	chr1	4936125
1	rs12037632	4996661	T	C	chr1	4936601
1	rs10915295	5001488	T	G	chr1	4941428
1	rs9286971	5003504	A	G	chr1	4943444
1	GSA-rs12757225	5005716	T	G	chr1	4945656
1	GSA-rs72634168	5009464	A	C	chr1	4949404
1	rs9426490	5011402	A	G	chr1	4951342
1	rs10915298	5012301	A	G	chr1	4952241
1	rs74653811	5015676	T	C	chr1	4955616
1	rs6656223	5015844	A	G	chr1	4955784
1	GSA-rs370614944	5016988	T	G	chr1	4956928
1	rs10799145	5021200	T	G	chr1	4961140
1	GSA-rs55899550	5021544	A	G	chr1	4961484
1	rs12754637	5023321	A	G	chr1	4963261
1	rs7523398	5024385	T	G	chr1	4964325
1	GSA-rs114377297	5026837	A	G	chr1	4966777
1	rs12025571	5029531	A	C	chr1	4969471
1	GSA-rs74836301	5030419	T	C	chr1	4970359
1	rs7535462	5033661	A	G	chr1	4973601
1	rs76290374	5034174	A	G	chr1	4974114
1	rs12757902	5036234	A	G	chr1	4976174
1	rs12122541	5036622	A	G	chr1	4976562
1	GSA-rs898335	5036777	T	G	chr1	4976717
1	GSA-rs75705882	5036940	T	C	chr1	4976880
1	rs6666618	5038093	A	C	chr1	4978033
1	GSA-rs12736331	5039514	T	C	chr1	4979454
1	rs6426376	5041894	A	C	chr1	4981834
1	GSA-rs12132419	5042941	A	G	chr1	4982881
1	rs1563791	5043734	A	C	chr1	4983674
1	rs7418901	5053263	T	C	chr1	4993203
1	GSA-rs74224268	5055888	T	C	chr1	4995828
1	GSA-rs116315507	5058911	A	G	chr1	4998851
1	rs10158288	5061519	T	C	chr1	5001459
1	rs34951087	5069170	T	G	chr1	5009110
1	rs12045336	5070663	A	G	chr1	5010603
1	rs9286975	5073092	A	G	chr1	5013032
1	rs9439575	5085955	A	G	chr1	5025895
1	rs9439507	5090997	A	G	chr1	5030937
1	GSA-rs12070935	5091631	A	G	chr1	5031571
1	rs6693990	5094435	A	G	chr1	5034375
1	GSA-rs143765258	5094655	T	C	chr1	5034595
1	rs1459762	5095862	T	C	chr1	5035802
1	GSA-rs74920522	5098913	A	G	chr1	5038853
1	GSA-rs116246934	5098991	T	C	chr1	5038931
1	GSA-rs80232804	5103451	A	C	chr1	5043391
1	rs10915324	5103621	A	G	chr1	5043561
1	rs1563792	5124859	A	G	chr1	5064799
1	GSA-rs116183990	5126826	A	G	chr1	5066766
1	GSA-rs72635377	5130529	T	C	chr1	5070469
1	rs10915335	5136477	T	C	chr1	5076417
1	GSA-rs11590026	5140226	A	G	chr1	5080166
1	rs3128687	5141293	T	G	chr1	5081233
1	GSA-rs78277981	5142530	T	C	chr1	5082470
1	rs10915341	5142552	T	G	chr1	5082492
1	rs3101214	5150534	A	G	chr1	5090474
1	rs2290848	5151437	A	C	chr1	5091377
1	GSA-rs56365782	5158512	T	C	chr1	5098452
1	rs9803863	5158857	A	G	chr1	5098797
1	rs57000660	5166480	A	G	chr1	5106420
1	GSA-rs10733013	5168663	T	C	chr1	5108603
1	GSA-rs77976132	5168872	T	C	chr1	5108812
1	rs7513590	5170712	A	G	chr1	5110652
1	rs10799170	5179530	A	C	chr1	5119470
1	rs77789556	5182124	T	G	chr1	5122064
1	GSA-rs79656278	5183841	A	G	chr1	5123781
1	rs6671889	5192703	A	C	chr1	5132643
1	rs10492925	5195371	T	C	chr1	5135311
1	rs10799173	5197977	T	C	chr1	5137917
1	rs12121369	5210124	A	C	chr1	5150064
1	rs12750297	5219272	A	C	chr1	5159212
1	rs17366543	5224616	A	G	chr1	5164556
1	GSA-rs79967614	5225760	T	C	chr1	5165700
1	GSA-rs61542310	5228983	A	C	chr1	5168923
1	GSA-rs16840071	5229311	A	G	chr1	5169251
1	rs4394703	5231892	A	C	chr1	5171832
1	GSA-rs6665697	5248541	T	C	chr1	5188481
1	GSA-rs117501869	5251475	T	C	chr1	5191415
1	rs2722781	5257229	T	C	chr1	5197169
1	GSA-rs80305867	5257327	A	G	chr1	5197267
1	rs7528871	5259095	A	C	chr1	5199035
1	rs12043987	5264697	A	G	chr1	5204637
1	rs6603821	5267850	A	G	chr1	5207790
1	GSA-rs79053480	5268005	A	C	chr1	5207945
1	GSA-rs145494905	5272403	T	C	chr1	5212343
1	rs16840190	5282726	T	C	chr1	5222666
1	GSA-rs78032816	5283285	T	G	chr1	5223225
1	GSA-rs938962	5283942	T	C	chr1	5223882
1	GSA-rs116478542	5284350	T	C	chr1	5224290
1	GSA-rs72636478	5288312	T	C	chr1	5228252
1	GSA-rs35457436	5288559	T	C	chr1	5228499
1	GSA-rs56295354	5294237	T	C	chr1	5234177
1	rs677735	5295176	A	G	chr1	5235116
1	GSA-rs116356697	5295574	T	C	chr1	5235514
1	GSA-rs586165	5297887	T	C	chr1	5237827
1	rs521430	5307076	T	C	chr1	5247016
1	GSA-rs75422994	5307136	A	G	chr1	5247076
1	GSA-rs7534404	5309255	A	G	chr1	5249195
1	GSA-rs78612437	5310840	A	C	chr1	5250780
1	GSA-rs4475768	5312165	T	G	chr1	5252105
1	rs6703948	5313445	A	C	chr1	5253385
1	GSA-rs112895933	5314570	T	C	chr1	5254510
1	rs12091281	5314737	T	C	chr1	5254677
1	GSA-rs72852179	5315344	T	C	chr1	5255284
1	GSA-rs7419115	5315712	A	G	chr1	5255652
1	GSA-rs72638072	5317014	T	C	chr1	5256954
1	GSA-rs12089315	5318552	T	C	chr1	5258492
1	GSA-rs630153	5321139	A	G	chr1	5261079
1	GSA-rs34488108	5321291	A	G	chr1	5261231
1	rs499416	5324231	T	C	chr1	5264171
1	GSA-rs75685860	5329177	A	G	chr1	5269117
1	rs579467	5329865	T	C	chr1	5269805
1	GSA-rs79350681	5330646	A	G	chr1	5270586
1	rs584938	5334079	A	C	chr1	5274019
1	rs4847576	5335599	T	C	chr1	5275539
1	rs549155	5338287	T	G	chr1	5278227
1	rs12141954	5342295	A	G	chr1	5282235
1	rs557477	5346474	T	G	chr1	5286414
1	rs563939	5347155	T	C	chr1	5287095
1	GSA-rs116293001	5347371	A	G	chr1	5287311
1	rs4417082	5348270	A	G	chr1	5288210
1	rs10915405	5348272	A	G	chr1	5288212
1	rs4514251	5348479	A	G	chr1	5288419
1	GSA-rs17457716	5353639	T	C	chr1	5293579
1	GSA-rs72639366	5354772	T	C	chr1	5294712
1	rs912988	5354844	T	C	chr1	5294784
1	GSA-rs115216699	5358282	T	C	chr1	5298222
1	GSA-rs78230742	5370017	T	C	chr1	5309957
1	rs5026665	5374940	A	G	chr1	5314880
1	rs79729928	5380047	A	C	chr1	5319987
1	rs9439565	5381250	T	C	chr1	5321190
1	GSA-rs115072908	5384943	A	G	chr1	5324883
1	rs79339794	5388176	T	C	chr1	5328116
1	GSA-rs115658511	5393462	T	C	chr1	5333402
1	rs2148211	5401364	A	G	chr1	5341304
1	rs10915416	5403031	A	G	chr1	5342971
1	GSA-rs17425370	5404340	T	C	chr1	5344280
1	rs12408534	5408123	T	C	chr1	5348063
1	GSA-rs77437426	5409829	T	G	chr1	5349769
1	rs4129058	5410542	T	C	chr1	5350482
1	rs74767203	5411516	T	C	chr1	5351456
1	GSA-rs78676548	5416417	T	C	chr1	5356357
1	GSA-rs79548697	5422873	T	C	chr1	5362813
1	GSA-rs72639400	5424331	T	C	chr1	5364271
1	GSA-rs142960388	5428790	A	G	chr1	5368730
1	GSA-rs145546757	5442150	A	C	chr1	5382090
1	rs74219217	5454407	T	C	chr1	5394347
1	rs36194643	5458909	A	G	chr1	5398849
1	rs61763344	5465505	A	G	chr1	5405445
1	GSA-rs61763346	5470084	A	G	chr1	5410024
1	GSA-rs147952355	5470441	A	G	chr1	5410381
1	GSA-rs56093319	5470968	T	G	chr1	5410908
1	rs7546092	5473983	A	G	chr1	5413923
1	rs11576458	5475581	T	C	chr1	5415521
1	rs6603835	5475663	A	C	chr1	5415603
1	rs3922826	5485177	T	G	chr1	5425117
1	GSA-rs7411401	5486073	A	G	chr1	5426013
1	rs6603840	5486898	A	C	chr1	5426838
1	rs12755610	5489018	A	G	chr1	5428958
1	rs10907211	5492043	A	C	chr1	5431983
1	GSA-rs7367086	5497307	T	G	chr1	5437247
1	rs12065301	5506194	A	G	chr1	5446134
1	GSA-rs12402981	5507130	T	C	chr1	5447070
1	GSA-rs78442356	5508774	A	G	chr1	5448714
1	GSA-rs76761725	5513490	T	C	chr1	5453430
1	rs11260694	5514194	T	C	chr1	5454134
1	GSA-rs75649467	5515727	A	G	chr1	5455667
1	rs12568815	5521691	T	C	chr1	5461631
1	GSA-rs72640642	5524343	A	C	chr1	5464283
1	rs59862356	5528176	A	G	chr1	5468116
1	GSA-rs7414322	5533601	T	C	chr1	5473541
1	rs7414864	5534326	T	G	chr1	5474266
1	rs12566781	5535339	A	G	chr1	5475279
1	GSA-rs12023817	5536722	A	C	chr1	5476662
1	GSA-rs61759135	5540162	T	C	chr1	5480102
1	GSA-rs149133833	5544377	A	G	chr1	5484317
1	rs12045091	5547562	T	C	chr1	5487502
1	rs11260698	5549525	T	C	chr1	5489465
1	rs9662668	5554049	A	G	chr1	5493989
1	rs2071953	5555141	A	G	chr1	5495081
1	rs2071959	5556067	A	G	chr1	5496007
1	rs1573738	5561229	T	C	chr1	5501169
1	GSA-rs9659669	5563399	A	G	chr1	5503339
1	GSA-rs9729649	5572304	A	G	chr1	5512244
1	GSA-rs111366004	5575737	A	C	chr1	5515677
1	rs12729096	5575910	T	C	chr1	5515850
1	GSA-rs11260635	5578655	T	C	chr1	5518595
1	rs9660967	5581798	T	C	chr1	5521738
1	GSA-rs144025097	5584515	A	G	chr1	5524455
1	rs2008457	5585215	A	G	chr1	5525155
1	GSA-rs9439581	5588846	A	C	chr1	5528786
1	rs7515958	5603850	A	G	chr1	5543790
1	GSA-rs77845703	5612051	T	C	chr1	5551991
1	rs80317570	5613767	A	G	chr1	5553707
1	rs11260644	5618182	T	C	chr1	5558122
1	rs9439613	5623965	T	C	chr1	5563905
1	GSA-rs115146518	5631455	T	C	chr1	5571395
1	GSA-rs61762111	5631820	T	C	chr1	5571760
1	GSA-rs11583994	5636176	A	G	chr1	5576116
1	GSA-rs11260650	5636697	T	C	chr1	5576637
1	GSA-rs1775406	5636893	A	C	chr1	5576833
1	GSA-rs115387623	5641458	T	C	chr1	5581398
1	GSA-rs7549896	5642705	T	G	chr1	5582645
1	GSA-rs986073	5654285	T	C	chr1	5594225
1	GSA-rs77884292	5657296	A	G	chr1	5597236
1	rs1775415	5657801	T	G	chr1	5597741
1	rs950601	5659587	T	G	chr1	5599527
1	rs707582	5671786	A	G	chr1	5611726
1	rs770718	5674434	T	C	chr1	5614374
1	rs9439585	5679368	T	C	chr1	5619308
1	rs10157819	5680572	A	G	chr1	5620512
1	GSA-rs999412	5681945	T	C	chr1	5621885
1	GSA-rs79319121	5683439	A	G	chr1	5623379
1	rs2173541	5684110	T	C	chr1	5624050
1	rs945322	5684301	A	C	chr1	5624241
1	rs770682	5689610	T	C	chr1	5629550
1	rs75624280	5693597	T	C	chr1	5633537
1	GSA-rs80235251	5695724	A	G	chr1	5635664
1	GSA-rs77597942	5695978	T	G	chr1	5635918
1	rs6690868	5701323	T	C	chr1	5641263
1	rs17028491	5703552	A	G	chr1	5643492
1	rs17028511	5704836	A	G	chr1	5644776
1	rs12129885	5705919	T	C	chr1	5645859
1	GSA-rs971816	5707091	A	C	chr1	5647031
1	rs4845812	5707816	T	C	chr1	5647756
1	rs709183	5709728	T	C	chr1	5649668
1	GSA-rs77980640	5710885	A	G	chr1	5650825
1	rs707590	5712831	A	G	chr1	5652771
1	rs2454615	5716860	T	C	chr1	5656800
1	rs11260671	5717388	T	C	chr1	5657328
1	GSA-rs6699073	5719531	A	G	chr1	5659471
1	exm2260467	5721189	A	G	chr1	5661129
1	rs770721	5722405	A	G	chr1	5662345
1	rs707580	5724940	T	C	chr1	5664880
1	GSA-rs7544244	5732221	A	G	chr1	5672161
1	rs771071	5732473	A	G	chr1	5672413
1	rs707593	5736682	A	G	chr1	5676622
1	rs74054464	5737319	T	C	chr1	5677259
1	rs10492948	5738500	A	G	chr1	5678440
1	rs811284	5739638	T	G	chr1	5679578
1	GSA-rs79882821	5747635	T	C	chr1	5687575
1	rs709188	5749083	A	G	chr1	5689023
1	rs1695616	5749226	A	G	chr1	5689166
1	rs2649070	5750125	T	C	chr1	5690065
1	rs770712	5751591	A	G	chr1	5691531
1	rs11579682	5752416	A	G	chr1	5692356
1	rs2649074	5755428	T	C	chr1	5695368
1	GSA-rs76470226	5760354	T	C	chr1	5700294
1	rs75517434	5761968	A	G	chr1	5701908
1	GSA-rs117919900	5762502	A	G	chr1	5702442
1	rs770693	5765353	T	C	chr1	5705293
1	GSA-rs75995367	5768379	A	G	chr1	5708319
1	GSA-rs12126945	5768607	T	C	chr1	5708547
1	rs873982	5770265	A	C	chr1	5710205
1	rs2649079	5770702	A	G	chr1	5710642
1	rs770697	5772500	A	G	chr1	5712440
1	GSA-rs12074462	5773754	A	G	chr1	5713694
1	GSA-rs116239429	5778800	A	G	chr1	5718740
1	rs2244632	5780697	A	G	chr1	5720637
1	GSA-rs193109673	5782019	A	C	chr1	5721959
1	GSA-rs79895490	5782727	A	G	chr1	5722667
1	rs2649084	5784433	T	C	chr1	5724373
1	rs2649083	5784445	A	G	chr1	5724385
1	rs11260678	5786865	T	C	chr1	5726805
1	GSA-rs114119915	5789247	A	C	chr1	5729187
1	rs59531141	5795581	A	G	chr1	5735521
1	rs12043762	5795600	A	G	chr1	5735540
1	rs2842253	5797096	T	C	chr1	5737036
1	GSA-rs2649063	5799631	A	G	chr1	5739571
1	GSA-rs2649066	5802390	A	G	chr1	5742330
1	GSA-rs72851690	5805356	T	C	chr1	5745296
1	GSA-rs185185944	5811532	A	G	chr1	5751472
1	rs12060804	5814154	A	G	chr1	5754094
1	GSA-rs116726230	5815715	A	G	chr1	5755655
1	GSA-rs80030164	5816959	A	G	chr1	5756899
1	GSA-rs183897984	5819985	A	C	chr1	5759925
1	GSA-rs12076190	5829039	T	C	chr1	5768979
1	GSA-rs4129514	5831601	A	G	chr1	5771541
1	rs28457723	5840181	A	G	chr1	5780121
1	GSA-rs72643071	5856161	T	C	chr1	5796101
1	rs75883988	5858429	T	C	chr1	5798369
1	rs7416733	5859110	A	G	chr1	5799050
1	rs4845818	5861105	A	G	chr1	5801045
1	GSA-rs28722621	5863100	T	C	chr1	5803040
1	rs28507073	5865275	T	C	chr1	5805215
1	GSA-rs7545456	5865928	T	C	chr1	5805868
1	rs9725925	5879772	T	C	chr1	5819712
1	rs9308476	5880466	A	C	chr1	5820406
1	rs9661840	5882333	T	C	chr1	5822273
1	GSA-rs10864640	5882696	A	G	chr1	5822636
1	rs1698976	5900795	T	C	chr1	5840735
1	GSA-rs72856113	5900914	T	C	chr1	5840854
1	rs17028806	5901895	A	G	chr1	5841835
1	rs11579662	5901975	T	C	chr1	5841915
1	rs74051373	5903474	T	C	chr1	5843414
1	rs1765719	5905929	T	G	chr1	5845869
1	rs11121402	5908794	T	C	chr1	5848734
1	rs74051394	5911588	A	C	chr1	5851528
1	GSA-rs12144662	5911666	T	C	chr1	5851606
1	GSA-rs34378703	5912942	A	G	chr1	5852882
1	rs548726	5913621	T	C	chr1	5853561
1	rs10157281	5915662	A	G	chr1	5855602
1	GSA-rs17431299	5917731	A	G	chr1	5857671
1	GSA-rs116266615	5917836	A	G	chr1	5857776
1	GSA-rs112282589	5919414	A	G	chr1	5859354
1	rs11121600	5921042	A	C	chr1	5860982
1	rs115910810	5923369	T	C	chr1	5863309
1	rs35641267	5923427	T	A	chr1	5863367
1	rs139203183	5923476	A	G	chr1	5863416
1	rs374146357	5923976	A	G	chr1	5863916
1	rs369162678	5924015	A	G	chr1	5863955
1	rs199583130	5924411	A	G	chr1	5864351
1	rs191062831	5924417	T	C	chr1	5864357
1	rs115526767	5924518	A	G	chr1	5864458
1	rs61739637	5924543	T	C	chr1	5864483
1	rs375237454	5924557	A	G	chr1	5864497
1	rs56293443	5924881	A	G	chr1	5864821
1	rs139022622	5926503	A	G	chr1	5866443
1	GSA-rs113445782	5927169	A	G	chr1	5867109
1	rs113445782	5927169	A	G	chr1	5867109
1	chr1-5927818	5927818	A	G	chr1	5867758
1	rs139767853	5927943	A	G	chr1	5867883
1	rs41280800	5933384	C	G	chr1	5873324
1	rs373369949	5934602	A	G	chr1	5874542
1	rs12084067	5935102	T	C	chr1	5875042
1	rs35575973	5935158	T	C	chr1	5875098
1	chr1-5937163	5937163	A	G	chr1	5877103
1	rs11121921	5939837	A	G	chr1	5879777
1	GSA-rs145033846	5940102	T	C	chr1	5880042
1	GSA-rs17472401	5940243	A	G	chr1	5880183
1	rs201527181	5947504	C	G	chr1	5887444
1	rs200821373	5947525	A	T	chr1	5887465
1	rs149244006	5950939	T	C	chr1	5890879
1	rs148424288	5950975	T	C	chr1	5890915
1	rs191913664	5951029	A	G	chr1	5890969
1	rs17432446	5952726	T	C	chr1	5892666
1	rs12401883	5957601	T	C	chr1	5897541
1	rs2312464	5960503	A	G	chr1	5900443
1	GSA-rs2134551	5961870	A	G	chr1	5901810
1	chr1-5964799	5964799	A	C	chr1	5904739
1	rs191602135	5964854	T	C	chr1	5904794
1	rs142994352	5965370	T	C	chr1	5905310
1	GSA-rs571655	5965455	T	C	chr1	5905395
1	rs200634524	5965746	T	C	chr1	5905686
1	rs145255635	5965833	A	G	chr1	5905773
1	rs146078470	5969280	A	G	chr1	5909220
1	GSA-rs77453462	5970367	T	C	chr1	5910307
1	rs12060900	5971314	A	G	chr1	5911254
1	GSA-rs76978389	5977154	T	C	chr1	5917094
1	GSA-rs149298553	5987139	T	C	chr1	5927079
1	seq-rs146637048	5993340	T	C	chr1	5933280
1	GSA-rs12118405	5994334	T	C	chr1	5934274
1	GSA-rs72630632	5998094	T	C	chr1	5938034
1	rs190940697	6007259	A	G	chr1	5947199
1	rs10779677	6007474	A	G	chr1	5947414
1	chr1-6008178	6008178	A	G	chr1	5948118
1	GSA-rs116716786	6008674	T	C	chr1	5948614
1	GSA-rs79815518	6013813	A	G	chr1	5953753
1	GSA-rs17028948	6016661	A	G	chr1	5956601
1	rs200711763	6021964	A	G	chr1	5961904
1	GSA-rs61762130	6022815	A	G	chr1	5962755
1	GSA-rs115476343	6028221	A	G	chr1	5968161
1	GSA-rs115443813	6030027	A	G	chr1	5969967
1	GSA-1:6031288	6031288	T	C	chr1	5971228
1	rs4908458	6033973	T	C	chr1	5973913
1	rs113902159	6038319	T	C	chr1	5978259
1	GSA-rs78708894	6043930	A	G	chr1	5983870
1	GSA-rs138361156	6044175	A	G	chr1	5984115
1	chr1-6046217	6046217	A	G	chr1	5986157
1	rs12142270	6046264	A	G	chr1	5986204
1	chr1-6046338	6046338	T	C	chr1	5986278
1	rs12124590	6060238	T	C	chr1	6000178
1	rs945613	6073537	A	G	chr1	6013477
1	rs905463	6073850	A	G	chr1	6013790
1	GSA-rs4908483	6074402	A	G	chr1	6014342
1	rs4908696	6074434	A	G	chr1	6014374
1	GSA-rs74707711	6076366	A	G	chr1	6016306
1	rs1295107	6079392	A	G	chr1	6019332
1	rs6688644	6079975	A	G	chr1	6019915
1	GSA-rs115572062	6084824	A	G	chr1	6024764
1	rs72630663	6091437	A	G	chr1	6031377
1	GSA-rs1295094	6095199	A	G	chr1	6035139
1	rs1295087	6100313	A	G	chr1	6040253
1	rs3789562	6104029	A	G	chr1	6043969
1	rs3789560	6104715	A	G	chr1	6044655
1	rs4908738	6105154	A	G	chr1	6045094
1	rs147130504	6111610	T	C	chr1	6051550
1	GSA-rs11589347	6111757	A	G	chr1	6051697
1	GSA-rs114203928	6115361	T	C	chr1	6055301
1	rs3789553	6117171	A	G	chr1	6057111
1	GSA-rs71629764	6120307	T	C	chr1	6060247
1	GSA-rs12145886	6125460	A	G	chr1	6065400
1	GSA-rs78988914	6126668	A	G	chr1	6066608
1	rs72630676	6129954	A	G	chr1	6069894
1	GSA-rs79760156	6135287	T	C	chr1	6075227
1	rs72862362	6138623	T	C	chr1	6078563
1	rs72862363	6138659	T	C	chr1	6078599
1	rs11121183	6139169	T	G	chr1	6079109
1	rs11583500	6140540	A	G	chr1	6080480
1	rs2294936	6145365	A	G	chr1	6085305
1	rs7512313	6145465	T	G	chr1	6085405
1	rs3747980	6145683	A	G	chr1	6085623
1	rs2273042	6149122	A	G	chr1	6089062
1	rs3789529	6153525	A	G	chr1	6093465
1	chr1-6157536	6157536	T	C	chr1	6097476
1	rs146277144	6158569	A	G	chr1	6098509
1	GSA-rs3810992	6162601	T	C	chr1	6102541
1	rs3810988	6164029	T	C	chr1	6103969
1	rs12094320	6167194	T	C	chr1	6107134
1	chr1-6170577	6170577	T	G	chr1	6110517
1	rs12142108	6170988	A	G	chr1	6110928
1	rs1883767	6175489	A	G	chr1	6115429
1	rs2843494	6183926	T	C	chr1	6123866
1	GSA-rs2235790	6191632	T	C	chr1	6131572
1	rs78406496	6199924	A	G	chr1	6139864
1	chr1-6204150	6204150	T	G	chr1	6144090
1	rs12067480	6205349	T	C	chr1	6145289
1	GSA-rs72632532	6205381	T	C	chr1	6145321
1	GSA-rs72632545	6211822	A	G	chr1	6151762
1	rs61760800	6216780	A	G	chr1	6156720
1	rs9434741	6217859	A	G	chr1	6157799
1	rs11121360	6220962	A	G	chr1	6160902
1	rs731975	6222501	A	C	chr1	6162441
1	rs12039290	6225739	A	C	chr1	6165679
1	rs114162822	6226940	A	G	chr1	6166880
1	rs61062646	6228783	A	G	chr1	6168723
1	rs60925969	6229093	A	G	chr1	6169033
1	rs80166192	6230852	A	G	chr1	6170792
1	rs11809884	6232569	T	C	chr1	6172509
1	rs4908863	6247066	T	C	chr1	6187006
1	GSA-rs7521209	6248784	T	C	chr1	6188724
1	rs2294714	6257826	T	C	chr1	6197766
1	GSA-rs3789521	6259043	A	G	chr1	6198983
1	GSA-rs45596539	6260826	A	G	chr1	6200766
1	GSA-rs12070387	6267531	T	C	chr1	6207471
1	chr1-6270469	6270469	A	G	chr1	6210409
1	chr1-6272342	6272342	T	C	chr1	6212282
1	chr1-6272763	6272763	T	C	chr1	6212703
1	GSA-rs12071731	6276167	T	G	chr1	6216107
1	rs68032129	6276561	T	C	chr1	6216501
1	rs846111	6279370	C	G	chr1	6219310
1	GSA-rs846110	6282950	T	G	chr1	6222890
1	GSA-rs75967030	6288383	A	G	chr1	6228323
1	GSA-rs114217031	6295625	A	G	chr1	6235565
1	rs9970334	6296238	T	G	chr1	6236178
1	rs56064414	6300395	T	C	chr1	6240335
1	rs114948575	6301067	A	G	chr1	6241007
1	GSA-rs72632572	6303383	T	C	chr1	6243323
1	rs114198341	6304454	A	G	chr1	6244394
1	rs12240078	6306912	T	C	chr1	6246852
1	seq-rs12744452	6308695	A	G	chr1	6248635
1	seq-rs776061422	6314749	A	G	chr1	6254689
1	rs74049515	6315125	A	G	chr1	6255065
1	GSA-rs114076019	6317585	T	C	chr1	6257525
1	rs4908543	6317983	T	C	chr1	6257923
1	rs55980313	6323110	T	C	chr1	6263050
1	GSA-rs12063157	6325098	T	C	chr1	6265038
1	rs183807070	6328129	T	G	chr1	6268069
1	rs35061492	6328483	A	G	chr1	6268423
1	GSA-rs3789513	6329989	T	C	chr1	6269929
1	GSA-rs77556705	6339145	A	G	chr1	6279085
1	GSA-rs67984858	6340557	T	C	chr1	6280497
1	chr1-6341309	6341309	T	C	chr1	6281249
1	GSA-rs41278926	6342795	T	C	chr1	6282735
1	GSA-rs12073007	6343714	A	C	chr1	6283654
1	rs35587207	6347149	T	C	chr1	6287089
1	rs3789500	6352084	A	G	chr1	6292024
1	rs7519033	6358895	A	G	chr1	6298835
1	GSA-rs113594183	6359997	T	G	chr1	6299937
1	GSA-rs60138626	6363163	T	G	chr1	6303103
[truncated: 728,061+ more rows]
