# Supplementary material for: Benchmark of star-allele caller algorithms to accurately assess haplotypes and phenotypes in pharmacogenetic studies
Source: Research Square preprint supplement (doi:10.21203/rs.3.rs-7924414/v1), 2025-11-06
Supplement: Supplementary file 5 [file fdf12ff5a0e44fbfa4c4c0a9.xlsx]

## Sheet: Feuil1
Table 1. Description of each star-allele caller used in the study
Pipeline	Language	input data	build	Number of genes	output
ursaPGx	R	VCF	GRCh37 GRCh38	15	-Diplotype prediction
		BAM for CYP2D6 only
PharmCAT	java	VCF	GRCh38	18	-Diplotype prediction
					-Phenotype prediction
					-Guidelines
Aldy	python	BAM	GRCh37 GRCh38	35	-Diplotype prediction
PyPGx	python	VCF, BAM	GRCh37 GRCh38	87	-Diplotype prediction
					-Phenotype prediction
